# Supplementary material for: MIF Inhibitor ISO-1 Protects Photoreceptors and Reduces Gliosis in Experimental Retinal Detachment
Source: PubMed Central journal article supplement (PMC5662618; doi:10.1038/s41598-017-14298-9), 2017-10-30
Supplement: 41598_2017_14298_MOESM1_ESM.pdf [file 41598_2017_14298_MOESM1_ESM.pdf]

# **MIF Inhibitor ISO-1 Protects Photoreceptors and Reduces Gliosis in Experimental Retinal Detachment**

**Bongsu Kim,<sup>1</sup> Rania Kusibati,<sup>1</sup> Tyler Heisler-Taylor,<sup>1</sup> Dimosthenis Mantopoulos,<sup>1</sup> Jiayi Ding,<sup>1</sup> Mohamed H. Abdel-Rahman,<sup>1,2,3</sup> Abhay R. Satoskar,<sup>4</sup> Jonathan P. Godbout,<sup>5</sup> Sanjoy K. Bhattacharya,<sup>6</sup> and Colleen M. Cebulla<sup>\*1</sup>**

1. Havener Eye Institute, Department of Ophthalmology and Visual Science, The Ohio State University Wexner Medical Center, Columbus, OH 43212.
2. Division Human Genetics, The Ohio State University Wexner Medical Center, Columbus, OH 43240.
3. Department of Pathology, Menoufiya University, Egypt
4. Division Experimental Pathology, The Ohio State University Wexner Medical Center, Columbus, OH 43210.
5. Department of Neuroscience, The Ohio State University Wexner Medical Center, Columbus, OH 43210.
6. Bascom Palmer Eye Institute, Department of Ophthalmology, The Miller School of Medicine, Miami, FL 33136.

\* Correspondence to

Colleen M. Cebulla, MD, PhD

915 Olentangy River Road, Suite 5000

Columbus, OH 43212

Phone 614-652-2600

Email: [colleen.cebulla@osumc.edu](mailto:colleen.cebulla@osumc.edu)

## **Supplementary Materials**

Please see supplementary materials for complete iTRAQ protein list and macrophages polarization studies.

**Figure S1.** ISO-1 does not alter retinal macrophage polarization.

**Table S1.** iTRAQ Proteomic Data: All Proteins with FDR < 0.05

**Table S2.** PCR primers

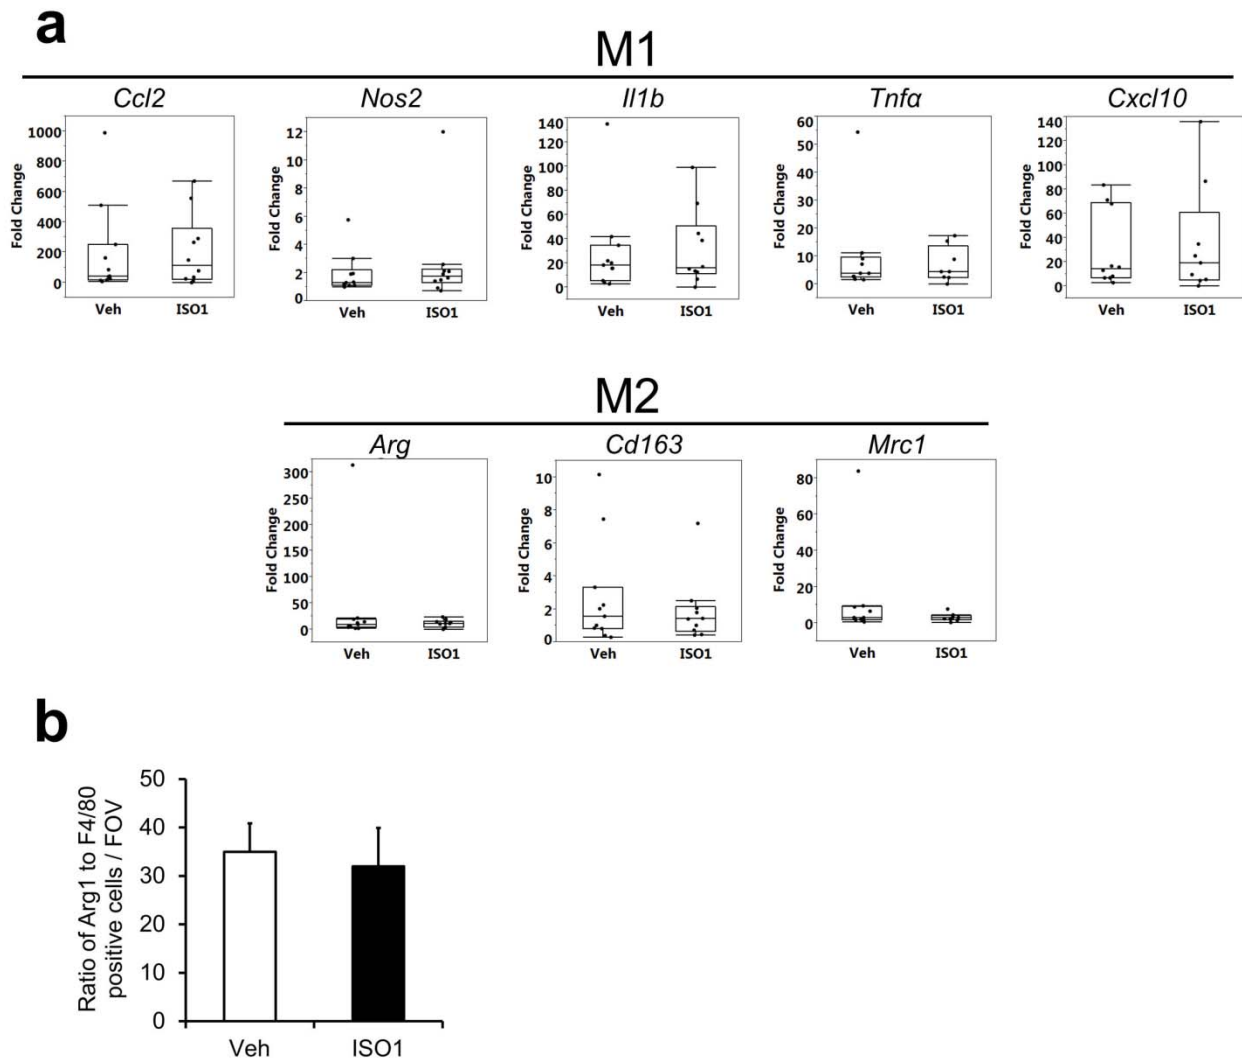

**Figure S1.** ISO-1 does not alter retinal macrophage polarization. **(a)** qPCR of gene expression in individual day 3 detached retinas (normalized to *Gapdh* and expressed as fold-change compared to fellow eye control retina) shows no significant difference in expression of specific M1 (*Ccl2* ( $p=0.45$ ), *Nos2* ( $p=0.27$ ), *Il1b* ( $p=0.42$ ), *Tnfa* ( $p=0.69$ ) and *Cxcl10* ( $p=0.36$ )) or M2 (*Arg1* ( $p=0.82$ ), *Cd163* ( $p=0.77$ ) and *Mrc1* ( $p=0.85$ )) genes with ISO-1 treatment. **(b)** Quantitation of Arg-1 positive to total (F4/80 positive) macrophages.

**Table S1. iTRAQ Proteomic Data: All Proteins with FDR < 0.05**

| ALL PROTEINS SORTED BY DESCENDING 2 WEEK RATIO                       |                                                              |          |                             |                             |                       |           |           |
|----------------------------------------------------------------------|--------------------------------------------------------------|----------|-----------------------------|-----------------------------|-----------------------|-----------|-----------|
| Swiss Protein #                                                      | Protein Name                                                 | MW (Kda) | Total Area in 2wk Treatment | Total Area in 4wk Treatment | Total Area in Control | 2wk Ratio | 4wk Ratio |
| P24622.1                                                             | Alpha-crystallin A chain                                     | 22.49    | 24181.09                    | 0                           | 0                     | Undef*    | Undef     |
| P61089.1                                                             | Ubiquitin-conjugating enzyme E2N                             | 17.14    | 10199.02                    | 8319.79                     | 0                     | Undef     | Undef     |
| P26350.2                                                             | Prothymosin alpha                                            | 12.26    | 9594.33                     | 0                           | 0                     | Undef     | Undef     |
| P63044.2                                                             | Vesicle-associated membrane protein 2                        | 12.69    | 6123.64                     | 4889.5                      | 0                     | Undef     | Undef     |
| Q99LF4.1                                                             | UPF0027 protein C22orf28 homolog                             | 55.26    | 5582.83                     | 6450.06                     | 0                     | Undef     | Undef     |
| Q9WVJ5.3                                                             | Beta-crystallin B1                                           | 28.01    | 5042.3                      | 0                           | 0                     | Undef     | Undef     |
| P04342.2<br>Q03740.4<br>Q9CXV3.3<br>P04344.3<br>P04345.2<br>Q61597.3 | Gamma-crystallin D                                           | 21.01    | 3924.47                     | 810.78                      | 0                     | Undef     | Undef     |
| O35633.3                                                             | Vascular inhibitory amino acid transporter 10D               | 57.39    | 3745.41                     | 6105.73                     | 0                     | Undef     | Undef     |
| P14231.2                                                             | ATPase, Na+/K+ transporting, beta 2 polypeptide              | 33.35    | 3561.26                     | 5832.68                     | 0                     | Undef     | Undef     |
| Q148R9.2                                                             | Regulator of G-protein signalling 9 binding protein          | 25.18    | 2672.02                     | 2502.36                     | 0                     | Undef     | Undef     |
| P62751.1                                                             | 60S ribosomal protein L23a                                   | 17.7     | 2426.28                     | 901.37                      | 0                     | Undef     | Undef     |
| Q6NVF9.1                                                             | Cleavage and polyadenylation specificity factor subunit 6    | 59.16    | 2414.83                     | 1884.92                     | 0                     | Undef     | Undef     |
| P80318.1                                                             | Chaperonin containing Tcp1, subunit 3 (gamma)                | 60.64    | 1794.38                     | 369.22                      | 0                     | Undef     | Undef     |
| Q9Z275.3                                                             | Retinaldehyde-binding protein 1                              | 36.42    | 1443.89                     | 3084.9                      | 0                     | Undef     | Undef     |
| O88746.1<br>Q5SRX1.1                                                 | Target of myb1-like 2 (chicken)                              | 54.33    | 1428.39                     | 732.34                      | 0                     | Undef     | Undef     |
| Q9DCS9.3                                                             | NADH dehydrogenase (ubiquinone) 1 beta subcomplex subunit 10 | 21.03    | 1236.96                     | 1125.06                     | 0                     | Undef     | Undef     |
| P28271.2<br>Q811J3.1                                                 | Aconitase 1                                                  | 98.19    | 1062.83                     | 626.63                      | 0                     | Undef     | Undef     |
| EDL33110.1                                                           | Splicing factor 3b, subunit 2                                | 98.22    | 1047.71                     | 836.13                      | 0                     | Undef     | Undef     |
| P24288.2                                                             | Branched-chain-amino-acid aminotransferase, cytosolic        | 42.8     | 1015.04                     | 0                           | 0                     | Undef     | Undef     |
| Q9D8B3.2                                                             | Chromatin modifying protein 4B                               | 24.94    | 942.19                      | 623.8                       | 0                     | Undef     | Undef     |
| P50518.2                                                             | Vacuolar proton pump subunit E 1                             | 26.16    | 928.31                      | 2121.26                     | 0                     | Undef     | Undef     |
| P60710.1<br>P63260.1                                                 | Actin, cytoplasmic 1                                         | 41.74    | 748.35                      | 2877.89                     | 0                     | Undef     | Undef     |
| P01942.2<br>P06467.2                                                 | Hemoglobin subunit alpha                                     | 15.09    | 732.27                      | 1548.91                     | 0                     | Undef     | Undef     |
| P09602.2                                                             | Non-histone chromosomal protein HMG-17                       | 9.42     | 713.04                      | 943.38                      | 0                     | Undef     | Undef     |
| Q02053.1                                                             | Ubiquitin-like modifier activating enzyme 1                  | 117.83   | 578.58                      | 0                           | 0                     | Undef     | Undef     |
| Q62167.3                                                             | Embryonic RNA helicase                                       | 73.11    | 480.42                      |                             | 0                     | Undef     | Undef     |
| Q9QW08.1                                                             | Phosducin                                                    | 28.02    | 444.13                      | 976.64                      | 0                     | Undef     | Undef     |
| Q3UIU2.3                                                             | NADH dehydrogenase [ubiquinone] 1 beta subcomplex subunit 6  | 15.52    | 295.38                      | 314.9                       | 0                     | Undef     | Undef     |
| O70251.5                                                             | Eukaryotic translation elongation factor 1 beta 2            | 24.7     | 280.17                      | 796.24                      | 0                     | Undef     | Undef     |

|                                                          |                                                                    |        |           |           |          |       |       |
|----------------------------------------------------------|--------------------------------------------------------------------|--------|-----------|-----------|----------|-------|-------|
| Q9CQX2.1                                                 | Cytochrome b5 type B                                               | 16.32  | 253.83    | 0         | 0        | Undef | Undef |
| Q9EQF6.1                                                 | Dihydropyrimidinase-related protein 5                              | 61.25  | 237.25    | 0         | 0        | Undef | Undef |
| P62696.2                                                 | Beta-crystallin B2                                                 | 23.39  | 56113.62  | 0         | 1700.19  | 33.00 | 0.00  |
| Q9JJU9.3                                                 | Beta-crystallin B3                                                 | 24.3   | 12504.74  | 1626.71   | 1028.54  | 12.16 | 1.58  |
| P62204.2                                                 | Calmodulin                                                         | 16.84  | 8826.97   | 8055.44   | 785.11   | 11.24 | 10.26 |
| P08228.2                                                 | Superoxide dismutase 1                                             | 15.95  | 4132.91   | 2269.88   | 492.25   | 8.40  | 4.61  |
| Q62318.3                                                 | Transcriptional corepressor TIF1beta                               | 82.83  | 2768.9    | 0         | 337.13   | 8.21  | 0.00  |
| P23927.2                                                 | Alpha-crystallin B chain                                           | 20.07  | 56323.52  | 2261.05   | 7173.68  | 7.85  | 0.32  |
| O54879.3                                                 | High mobility group protein B3                                     | 23.01  | 2451.69   | 840.39    | 315.29   | 7.78  | 2.67  |
| Q9JJV1.3                                                 | Beta-crystallin A2                                                 | 22.24  | 28616.83  | 2018.08   | 3726.7   | 7.68  | 0.54  |
| Q61029.3                                                 | Lamina-associated polypeptide 2, isoforms beta/delta/epsilon/gamma | 50.3   | 8912.23   | 6426.06   | 1193.33  | 7.47  | 5.38  |
| Q9JJV0.3                                                 | Beta-crystallin A4                                                 | 22.47  | 30635.81  | 0         | 4182.34  | 7.33  | 0.00  |
| Q61656.1                                                 | RNA helicase p68                                                   | 69.33  | 3161.17   | 744.32    | 463.87   | 6.81  | 1.60  |
| P63028.1                                                 | Tumor protein, translationally-controlled 1                        | 19.46  | 11030.75  | 10353.32  | 1781.43  | 6.19  | 5.81  |
| P48193.2                                                 | Erythrocyte protein band 4.1                                       | 95.93  | 7957.56   | 1637.76   | 1291.39  | 6.16  | 1.27  |
| P46471.5                                                 | Proteasome 26S subunit ATPase 2                                    | 48.66  | 9047.89   | 5672.95   | 1518.83  | 5.96  | 3.74  |
| O35737.3<br>P70333.1                                     | Heterogeneous nuclear ribonucleoprotein H1                         | 49.21  | 14635.49  | 11500.97  | 2463.04  | 5.94  | 4.67  |
| Q8BG05.1<br>P49312.2                                     | Heterogeneous nuclear ribonucleoprotein HA3                        | 39.66  | 2206.54   | 444.11    | 387.96   | 5.69  | 1.14  |
| Q9JIQ3.1                                                 | Diablo homolog (Drosophila)                                        | 26.84  | 2589.72   | 821.89    | 461.29   | 5.61  | 1.78  |
| P14094.1                                                 | Sodium/potassium-dependent ATPase subunit beta-1                   | 35.2   | 2447.73   | 1632.09   | 444.79   | 5.50  | 3.67  |
| Q59J78.1                                                 | Mimitin, mitochondrial                                             | 19.63  | 4217.82   | 2634.77   | 779.78   | 5.41  | 3.38  |
| P12787.2                                                 | Cytochrome c oxidase subunit 5A, mitochondrial                     | 16.1   | 3532.55   | 4748.54   | 658.9    | 5.36  | 7.21  |
| Q9WVT6.1                                                 | Carbonic anhydrase 14                                              | 37.51  | 2761.02   | 1121.98   | 522.21   | 5.29  | 2.15  |
| Q8BL97.1                                                 | Serine/arginine-rich splicing factor 7                             | 30.82  | 1799.83   | 1104      | 340.97   | 5.28  | 3.24  |
| O08539.1                                                 | Myc box-dependent-interacting protein 1                            | 64.48  | 8092.18   | 2841.11   | 1543.61  | 5.24  | 1.84  |
| Q61597.3                                                 | Gamma-crystallin C                                                 | 20.92  | 212073.68 | 14072.34  | 40904.88 | 5.18  | 0.34  |
| Q9JM96.1                                                 | Cdc42 effector protein 4                                           | 37.87  | 17089.85  | 17928.37  | 3379.61  | 5.06  | 5.30  |
| Q91WU5.1                                                 | Arsenite methyltransferase                                         | 41.8   | 1673.88   | 185.21    | 339.92   | 4.92  | 0.54  |
| O35486.3                                                 | Beta-crystallin S                                                  | 20.85  | 23553.22  | 2388.94   | 4819.85  | 4.89  | 0.50  |
| Q5SUR0.1                                                 | Phosphoribosylformylglycinamide synthase                           | 144.65 | 1949.82   | 1322.24   | 403.35   | 4.83  | 3.28  |
| Q6IRU2.3                                                 | Tropomyosin 4                                                      | 28.47  | 2041.69   | 2834.1    | 424.82   | 4.81  | 6.67  |
| P52480.4                                                 | Pyruvate kinase muscle isozyme                                     | 57.85  | 6396.53   | 5781.34   | 1351.92  | 4.73  | 4.28  |
| P02088.2<br>P02089.2<br>P02104.2<br>P04444.3<br>P04443.5 | Hemoglobin subunit beta-1                                          | 15.84  | 426079.84 | 246470.22 | 91563.03 | 4.65  | 2.69  |
| P06151.3<br>P16125.2<br>P00342.2                         | L-lactate dehydrogenase A chain                                    | 36.5   | 2836.82   | 2244.26   | 609.98   | 4.65  | 3.68  |
| Q8R1W8.1                                                 | Interphotoreceptor matrix proteoglycan 1                           | 89.49  | 8176.43   | 7044.2    | 1792.02  | 4.56  | 3.93  |

|          |                                                                                           |        |           |          |          |      |      |
|----------|-------------------------------------------------------------------------------------------|--------|-----------|----------|----------|------|------|
| P04344.3 | Gamma-crystallin B                                                                        | 21.14  | 102221.95 | 6393.76  | 22605.57 | 4.52 | 0.28 |
| P61982.2 | Tyrosine 3-monooxygenase/tryptophan 5-monooxygenase activation protein, gamma polypeptide | 28.31  | 6918.93   | 1979.98  | 1575.31  | 4.39 | 1.26 |
| P08752.4 | G protein Gi2 alpha                                                                       | 40.48  | 2877.17   | 1473.3   | 656.43   | 4.38 | 2.24 |
| Q5XG69.2 | Fam169a protein                                                                           | 73.27  | 1259.76   | 1700.35  | 293.81   | 4.29 | 5.79 |
| Q91VR2.1 | ATP synthase subunit gamma, mitochondrial                                                 | 32.89  | 3996.72   | 4491.29  | 965.86   | 4.14 | 4.65 |
| P20612.3 | Rod-type transducin alpha subunit                                                         | 39.97  | 3678.58   | 2098.15  | 897.18   | 4.10 | 2.34 |
| Q7TQF7.1 | Amphiphysin                                                                               | 75.03  | 6751.83   | 5128.86  | 1655.48  | 4.08 | 3.10 |
| P02088.2 | Hemoglobin subunit beta-1                                                                 | 15.84  | 69331.96  | 31995.95 | 17292.18 | 4.01 | 1.85 |
| O35326.1 | Serine/arginine-rich splicing factor 5                                                    | 30.95  | 3617.17   | 1153.41  | 915.56   | 3.95 | 1.26 |
| Q00915.2 | Retinol-binding protein 1                                                                 | 15.85  | 5865.27   | 6213.71  | 1493.18  | 3.93 | 4.16 |
| P11031.3 | SUB1 homolog                                                                              | 14.43  | 9495.94   | 7053.68  | 2441.04  | 3.89 | 2.89 |
| O54983.1 | Mu-crystallin homolog                                                                     | 33.53  | 5676.2    | 2669.46  | 1461.76  | 3.88 | 1.83 |
| P63325.1 | 40S ribosomal protein S10                                                                 | 18.92  | 26719.4   | 17879.76 | 7091.96  | 3.77 | 2.52 |
| Q9DB20.1 | ATP synthase subunit O, mitochondrial                                                     | 23.37  | 8835.4    | 4135.24  | 2363.55  | 3.74 | 1.75 |
| Q3U0V1.1 | Far upstream element-binding protein 2                                                    | 76.83  | 9987.53   | 9289.15  | 2673.77  | 3.74 | 3.47 |
| Q99L13.1 | 3-hydroxyisobutyrate dehydrogenase, mitochondrial                                         | 35.44  | 5704.01   | 4339.65  | 1547.98  | 3.68 | 2.80 |
| P02525.1 | Beta-crystallin A1                                                                        | 23.41  | 84148.33  | 31972.28 | 22944.86 | 3.67 | 1.39 |
| P99028.2 | Cytochrome b-c1 complex subunit 6, mitochondrial                                          | 10.44  | 5542.12   | 4216.49  | 1524.25  | 3.64 | 2.77 |
| P12382.3 | Phosphofructokinase 1                                                                     | 85.31  | 3964.67   | 2360.7   | 1095.33  | 3.62 | 2.16 |
| P35700.1 | Peroxiredoxin 1                                                                           | 22.18  | 12360.24  | 14324.8  | 3415.58  | 3.62 | 4.19 |
| P35564.1 | Calnexin                                                                                  | 67.28  | 2839.24   | 2498.99  | 830.31   | 3.42 | 3.01 |
| Q9D8Y0.1 | EF hand domain containing 2                                                               | 26.8   | 5306.37   | 3327.7   | 1566.48  | 3.39 | 2.12 |
| P24549.5 | Retinal dehydrogenase 1                                                                   | 54.48  | 2259.61   | 3049.02  | 677.39   | 3.34 | 4.50 |
| P16858.2 | Glyceraldehyde-3-phosphate dehydrogenase                                                  | 35.81  | 8088.75   | 7873.62  | 2433.15  | 3.32 | 3.24 |
| P80313.1 | T-complex protein 1 subunit eta                                                           | 59.66  | 5315.66   | 4406.01  | 1610.78  | 3.30 | 2.74 |
| Q9D1K2.2 | V-type proton ATPase subunit F                                                            | 13.37  | 16079.2   | 16065.27 | 4878.29  | 3.30 | 3.29 |
| Q6PHZ2.1 | Calcium/calmodulin-dependent protein kinase type II delta chain                           | 56.38  | 6032.79   | 4640.37  | 1850.78  | 3.26 | 2.51 |
| Q64523.3 | Histone H2A type 2C                                                                       | 13.99  | 8447.43   | 7682.35  | 2639.83  | 3.20 | 2.91 |
| P50516.2 | V-type proton ATPase catalytic subunit A                                                  | 68.33  | 1512.01   | 2390.21  | 473.94   | 3.19 | 5.04 |
| Q99JF8.1 | PC4 and SFRS1 interacting protein 1                                                       | 59.71  | 18685.6   | 14880.96 | 5922.72  | 3.15 | 2.51 |
| Q9JIX8.2 | Apoptotic chromatin condensation inducer in the nucleus                                   | 150.72 | 26402.33  | 15840.9  | 8565.74  | 3.08 | 1.85 |
| P97370.1 | Sodium/potassium-transporting ATPase subunit beta-3                                       | 31.78  | 9221.83   | 7903.77  | 3054.73  | 3.02 | 2.59 |
| Q60668.2 | Heterogeneous nuclear ribonucleoprotein D0                                                | 38.36  | 18349.77  | 17466.82 | 6110.31  | 3.00 | 2.86 |
| Q9CZW5.1 | Translocase of outer mitochondrial membrane 70 homolog A (yeast)                          | 67.53  | 10448.75  | 7460.74  | 3534.36  | 2.96 | 2.11 |
| P20444.3 | Protein kinase C, alpha                                                                   | 76.86  | 20419.48  | 17117.23 | 7025.37  | 2.91 | 2.44 |

|                      |                                                                                             |        |          |          |          |      |      |
|----------------------|---------------------------------------------------------------------------------------------|--------|----------|----------|----------|------|------|
| Q7TMM9.1             | Tubulin beta-2A chain                                                                       | 49.92  | 29009.67 | 22038.55 | 9996.3   | 2.90 | 2.20 |
| Q9CSU0.2             | Cell cycle-related and expression-elevated protein in tumor                                 | 36.89  | 793.01   | 941.84   | 277.3    | 2.86 | 3.40 |
| Q91YT0.1             | NADH-ubiquinone oxidoreductase 51 kDa subunit                                               | 50.84  | 1638.27  | 1463.66  | 574.13   | 2.85 | 2.55 |
| P62259.1             | Tyrosine 3-monooxygenase/tryptophan 5-monooxygenase activation protein, epsilon polypeptide | 29.18  | 4290.64  | 1638.96  | 1509.37  | 2.84 | 1.09 |
| P99026.1             | Proteasome subunit, beta type 4                                                             | 28.99  | 2389.68  | 4115.01  | 862.11   | 2.77 | 4.77 |
| Q04447.1             | Creatine kinase B-type                                                                      | 42.72  | 9014.48  | 10564.06 | 3274.85  | 2.75 | 3.23 |
| Q52KI8.1             | Serine/arginine repetitive matrix protein 1                                                 | 106.91 | 29163.71 | 16306.29 | 10844.67 | 2.69 | 1.50 |
| P10630.2             | Protein synthesis initiation factor 4A                                                      | 46.41  | 16616.88 | 15916.03 | 6200.09  | 2.68 | 2.57 |
| Q8R1B5.1             | Complexin-3                                                                                 | 10.37  | 44258.38 | 26332.53 | 16515.56 | 2.68 | 1.59 |
| Q501J6.1             | Probable ATP-dependent RNA helicase DDX17                                                   | 72.41  | 4192.48  | 1970.21  | 1565.96  | 2.68 | 1.26 |
| P19536.1             | Cytochrome c oxidase polypeptide Vb                                                         | 13.82  | 3967.98  | 1742.22  | 1495.72  | 2.65 | 1.16 |
| P47962.3             | 60S ribosomal protein L5                                                                    | 34.41  | 12134.49 | 11293.41 | 4616.95  | 2.63 | 2.45 |
| Q9CRB9.1             | Coiled-coil-helix-coiled-coil-helix domain-containing protein 3, mitochondrial              | 26.34  | 10975.34 | 6715.59  | 4204.49  | 2.61 | 1.60 |
| P31648.2             | Sodium- and chloride-dependent GABA transporter 1                                           | 67.01  | 89511.63 | 77110.21 | 34395.34 | 2.60 | 2.24 |
| P30681.3             | High mobility group protein B2                                                              | 24.16  | 26162.88 | 18308.46 | 10096.6  | 2.59 | 1.81 |
| P31650.1             | Sodium- and chloride-dependent GABA transporter 3                                           | 69.9   | 9212.58  | 8175.16  | 3562.6   | 2.59 | 2.29 |
| P70404.1             | Isocitric dehydrogenase subunit gamma                                                       | 42.79  | 6460.35  | 4468.21  | 2507.81  | 2.58 | 1.78 |
| Q8BLK3.1             | Limbic system-associated membrane protein                                                   | 38.09  | 2335.72  | 4428.68  | 906.76   | 2.58 | 4.88 |
| Q9CQ89.3             | Brain acetylcholinesterase putative membrane anchor                                         | 18.87  | 4554.5   | 3665.98  | 1778.28  | 2.56 | 2.06 |
| Q00623.1             | Apolipoprotein A-I                                                                          | 30.6   | 4624.76  | 848.32   | 1807.95  | 2.56 | 0.47 |
| Q8K003.1             | Coiled-coil domain-containing protein 72                                                    | 7.07   | 29252.97 | 18895.06 | 11467.98 | 2.55 | 1.65 |
| Q8CIE6.1             | Coatmer protein complex subunit alpha                                                       | 138.47 | 6494.61  | 6601.88  | 2559.77  | 2.54 | 2.58 |
| Q99PT1.3             | Rho GDP dissociation inhibitor 1                                                            | 23.41  | 6615.84  | 7648.32  | 2610.02  | 2.53 | 2.93 |
| P49722.2             | Proteasome subunit alpha type-2                                                             | 25.93  | 7557.74  | 4923.28  | 2994.9   | 2.52 | 1.64 |
| P07724.3<br>P02772.1 | Serum albumin                                                                               | 68.7   | 6082.72  | 3371.51  | 2412.8   | 2.52 | 1.40 |
| P10637.3             | Microtubule-associated protein tau isoform b                                                | 76.26  | 17878.29 | 11214.5  | 7105.01  | 2.52 | 1.58 |
| Q9QZ06.1             | Toll interacting protein                                                                    | 30.35  | 8038.4   | 5694.64  | 3195.89  | 2.52 | 1.78 |
| O08795.1             | Glucosidase 2 subunit beta                                                                  | 58.8   | 12484.76 | 8407.29  | 4968.34  | 2.51 | 1.69 |
| Q99020.1             | Heterogeneous nuclear ribonucleoprotein A/B                                                 | 30.84  | 12461.34 | 14428.6  | 4969.93  | 2.51 | 2.90 |
| P10107.2             | Annexin A1                                                                                  | 38.74  | 6665.01  | 3027.56  | 2674.5   | 2.49 | 1.13 |
| P18872.3             | Guanine nucleotide binding protein, alpha o isoform A                                       | 40.09  | 44841.72 | 43398.99 | 18024.27 | 2.49 | 2.41 |
| P57780.1             | Non-muscle alpha-actinin 4                                                                  | 105    | 18083.9  | 15843.58 | 7342.45  | 2.46 | 2.16 |
| Q8BGD9.1             | Eukaryotic translation initiation factor 4B                                                 | 68.85  | 8746.16  | 7346.48  | 3561.58  | 2.46 | 2.06 |

|             |                                                           |        |           |           |          |      |      |
|-------------|-----------------------------------------------------------|--------|-----------|-----------|----------|------|------|
| P00405.1    | Cytochrome C oxidase subunit 2                            | 25.98  | 9366.25   | 17373.49  | 3814.8   | 2.46 | 4.55 |
| Q8BP92.1    | Reticulocalbin 2                                          | 37.28  | 3243.42   | 2578.68   | 1321.1   | 2.46 | 1.95 |
| Q9WTT4.1    | V-type proton ATPase subunit G 2                          | 13.66  | 2935.26   | 2897.78   | 1217.26  | 2.41 | 2.38 |
| P47708.2    | Rabphilin 3A                                              | 75.5   | 7923.63   | 10194.69  | 3312.19  | 2.39 | 3.08 |
| P16858.2    | Glyceraldehyde-3-phosphate dehydrogenase                  | 35.81  | 26452.97  | 11145.87  | 11147.95 | 2.37 | 1.00 |
| Q60972.4    | Retinoblastoma-binding protein 4                          | 47.66  | 13005.98  | 9899.45   | 5486.43  | 2.37 | 1.80 |
| P20029.3    | Immunoglobulin heavy chain-binding protein                | 72.43  | 8349.11   | 6081.91   | 3542.65  | 2.36 | 1.72 |
| P26443.1    | Glutamate dehydrogenase 1                                 | 61.34  | 6555.27   | 5726.4    | 2795.8   | 2.34 | 2.05 |
| Q9WV55.2    | Vesicle-associated membrane protein, associated protein A | 27.86  | 18811.09  | 8761.16   | 8043.72  | 2.34 | 1.09 |
| P17710.2    | Hexokinase 1                                              | 108.32 | 1297.1    | 3088.18   | 557.36   | 2.33 | 5.54 |
| O35215.3    | D-dopachrome decarboxylase                                | 13.08  | 8751.73   | 5141.54   | 3769.93  | 2.32 | 1.36 |
| Q62093.4    | Serine/arginine-rich splicing factor 2                    | 25.48  | 2618.81   | 1143.24   | 1132.99  | 2.31 | 1.01 |
| Q7TNV0.1    | Protein DEK                                               | 43.16  | 11194.6   | 9253.78   | 4852.17  | 2.31 | 1.91 |
| P35803.2    | Neuronal membrane glycoprotein M6-b                       | 36.22  | 18660.55  | 17096.86  | 8096.68  | 2.30 | 2.11 |
| Q9D0M3.1    | Cytochrome c1, heme protein, mitochondrial                | 35.33  | 7242.41   | 6179.25   | 3147.02  | 2.30 | 1.96 |
| P08113.2    | Endoplasmin                                               | 92.49  | 4607.99   | 3653.32   | 2002.84  | 2.30 | 1.82 |
| P63158.2    | High mobility group protein B1                            | 24.9   | 50850.31  | 31276.46  | 22140.23 | 2.30 | 1.41 |
| P61264.1    | Syntaxin 1B                                               | 33.25  | 12346.72  | 7530.91   | 5396.87  | 2.29 | 1.40 |
| Q80TB8.2    | Synaptic vesicle membrane protein VAT-1 homolog-like      | 45.82  | 20176.46  | 13038.15  | 8866.82  | 2.28 | 1.47 |
| P16546.4    | Alpha-II spectrin                                         | 284.66 | 4373.8    | 1551.39   | 1933.09  | 2.26 | 0.80 |
| Q9Z273.1    | Tubby like protein 1                                      | 60.34  | 11038.76  | 5107.89   | 4886.93  | 2.26 | 1.05 |
| P46935.3    | Ubiquitin-protein ligase NEDD4                            | 102.72 | 6311.79   | 7798.78   | 2803.24  | 2.25 | 2.78 |
| BAE37215.1  | Unnamed protein product                                   | 16.15  | 2499.4    | 0         | 1110.53  | 2.25 | 0.00 |
| Q62261.2    | Spectrin beta chain, brain 1                              | 274.28 | 145790.14 | 99552.82  | 64798.08 | 2.25 | 1.54 |
| Q06185.2    | ATP synthase subunit e, mitochondrial                     | 8.24   | 25367.74  | 21354.29  | 11291.78 | 2.25 | 1.89 |
| P51859.2    | Hepatoma derived growth factor                            | 26.27  | 38651.42  | 29131.4   | 17265.4  | 2.24 | 1.69 |
| P23198.2    | Chromobox protein homolog 3                               | 20.86  | 4492.49   | 0         | 2010.43  | 2.23 | 0.00 |
| Q9D0J8.3    | Parathyrosin                                              | 11.43  | 17494.31  | 13805.77  | 7838.87  | 2.23 | 1.76 |
| P46096.1    | Synaptotagmin 1                                           | 47.42  | 12967.6   | 14022.08  | 5879.26  | 2.21 | 2.39 |
| P26041.3    | Moesin                                                    | 67.78  | 8591.16   | 8244.09   | 3897.31  | 2.20 | 2.12 |
| Q9JHU4.1    | Cytoplasmic dynein 1 heavy chain 1                        | 532.13 | 11589.4   | 6774.75   | 5260.89  | 2.20 | 1.29 |
| Q9R1P4.1    | Proteasome subunit alpha type 1                           | 29.55  | 8932.56   | 8932.54   | 4057.54  | 2.20 | 2.20 |
| XP_983229.1 | 40S ribosomal protein S12-like                            | 14.49  | 25581.32  | 25048.77  | 11625.69 | 2.20 | 2.15 |
| Q60597.3    | 2-oxoglutarate dehydrogenase complex component E1         | 116.47 | 30432.13  | 26448.5   | 13836.56 | 2.20 | 1.91 |
| Q91X97.4    | Neurocalcin-delta                                         | 22.25  | 8524.84   | 10236.39  | 3879.69  | 2.20 | 2.64 |
| Q9Z2X1.3    | Heterogeneous nuclear ribonucleoprotein F                 | 45.74  | 2405.12   | 3871.37   | 1094.81  | 2.20 | 3.54 |
| O88271.1    | Craniofacial development protein 1                        | 32.81  | 22268.32  | 18647.22  | 10154.63 | 2.19 | 1.84 |
| Q91ZZ3.1    | Beta-synuclein                                            | 14.05  | 153461.33 | 114748.73 | 70060.86 | 2.19 | 1.64 |



|          |                                                                      |        |          |          |          |      |      |
|----------|----------------------------------------------------------------------|--------|----------|----------|----------|------|------|
| Q9R0P4.1 | Small acidic protein                                                 | 45.74  | 11932.3  | 8909.65  | 5464.29  | 2.18 | 1.63 |
| P49817.1 | Caveolin-1                                                           | 20.54  | 17735.57 | 15737.36 | 8137.56  | 2.18 | 1.93 |
| Q9DCT2.2 | NADH dehydrogenase [ubiquinone] iron-sulfur protein 3, mitochondrial | 30.15  | 10435.59 | 11112.37 | 4801.2   | 2.17 | 2.31 |
| Q91V61.1 | Sideroflexin-3                                                       | 35.41  | 3125.14  | 1523.69  | 1439.86  | 2.17 | 1.06 |
| Q35381.1 | Acidic leucine-rich nuclear phosphoprotein 32 family member A        | 28.54  | 17615.64 | 16772.23 | 8127.26  | 2.17 | 2.06 |
| Q9CZ13.1 | Cytochrome b-c1 complex subunit 1, mitochondrial                     | 52.78  | 10544.87 | 7038.68  | 4881.99  | 2.16 | 1.44 |
| Q99P72.2 | Neurite outgrowth inhibitor                                          | 126.63 | 4190.71  | 2040.9   | 1942.5   | 2.16 | 1.05 |
| P31786.2 | Acyl-CoA-binding protein                                             | 10     | 20496.25 | 19182.33 | 9501.31  | 2.16 | 2.02 |
| P17742.2 | Peptidyl-prolyl cis-trans isomerase A                                | 17.97  | 17037.9  | 10064.62 | 7901.16  | 2.16 | 1.27 |
| Q91WJ8.1 | Far upstream element (FUSE) binding protein 1                        | 68.56  | 36445.18 | 35249.27 | 16907.51 | 2.16 | 2.08 |
| Q9R0P9.1 | Ubiquitin carboxyl-terminal hydrolase isozyme L1                     | 24.84  | 68304.19 | 64010.88 | 31717.59 | 2.15 | 2.02 |
| P47753.4 | F-actin-capping protein subunit alpha-1                              | 32.95  | 35736.42 | 21495.29 | 16630.5  | 2.15 | 1.29 |
| Q8K183.1 | Pyridoxal kinase                                                     | 35.02  | 11708.58 | 10429.7  | 5450.76  | 2.15 | 1.91 |
| P62702.2 | 40S ribosomal protein S4, X isoform                                  | 29.6   | 10041.52 | 8398.14  | 4684.02  | 2.14 | 1.79 |
| Q61644.1 | Protein kinase C and casein kinase substrate in neurons 1 isoform 1  | 50.59  | 21769.08 | 16839.72 | 10177.01 | 2.14 | 1.65 |
| Q64704.1 | Syntaxin 3A                                                          | 33.25  | 10154.43 | 7554.3   | 4757.11  | 2.13 | 1.59 |
| Q80XU3.1 | Nuclear ubiquitous casein and cyclin-dependent kinases substrate     | 26.32  | 20342.2  | 18885.12 | 9548.2   | 2.13 | 1.98 |
| P52293.2 | Importin alpha P1                                                    | 57.94  | 6751.75  | 9184.2   | 3169.95  | 2.13 | 2.90 |
| Q9D710.1 | Thioredoxin-related transmembrane protein 2                          | 33.95  | 12466.04 | 8804.2   | 5871.23  | 2.12 | 1.50 |
| P18760.3 | Cofilin-1                                                            | 18.56  | 27050.93 | 27944.34 | 12757.07 | 2.12 | 2.19 |
| Q9DC69.1 | NADH dehydrogenase [ubiquinone] 1 alpha subcomplex                   | 42.51  | 3992.3   | 1653.11  | 1887.02  | 2.12 | 0.88 |
| Q9CT10.2 | Ran-binding protein 3                                                | 52.58  | 11029.31 | 6761.14  | 5213.25  | 2.12 | 1.30 |
| Q8R0A7.1 | Uncharacterized protein KIAA0513                                     | 46.33  | 40821.59 | 40997.04 | 19306.24 | 2.11 | 2.12 |
| P46460.2 | Vesicle-fusing ATPase                                                | 82.63  | 28656.55 | 26301.71 | 13646.02 | 2.10 | 1.93 |
| P62270.3 | 40S ribosomal protein S18                                            | 17.72  | 9269.96  | 6746.84  | 4415.25  | 2.10 | 1.53 |
| P11352.2 | Glutathione peroxidase 1                                             | 22.18  | 9088.67  | 8650.58  | 4346.3   | 2.09 | 1.99 |
| Q9DBJ1.3 | Phosphoglycerate mutase 1                                            | 28.84  | 25567.69 | 21260.43 | 12272.12 | 2.08 | 1.73 |
| P15864.2 | Histone H1.2                                                         | 21.27  | 19647.88 | 22139.96 | 9435.2   | 2.08 | 2.35 |
| Q9Z2W0.1 | Aspartyl aminopeptidase                                              | 52.17  | 12652.62 | 8069.76  | 6089.63  | 2.08 | 1.33 |
| P14152.3 | Malate dehydrogenase, cytoplasmic                                    | 36.52  | 26915.12 | 18580.71 | 12959.36 | 2.08 | 1.43 |
| P48722.2 | Heat shock 70 kDa protein 4L                                         | 94.4   | 1423.67  | 3492.55  | 687.8    | 2.07 | 5.08 |
| Q91WQ3.3 | Tyrosyl-tRNA synthetase, cytoplasmic                                 | 59.11  | 14438.23 | 12228.33 | 6987.03  | 2.07 | 1.75 |
| P12367.2 | cAMP-dependent protein kinase type II-alpha regulatory subunit       | 45.4   | 10968.92 | 8019.57  | 5345.68  | 2.05 | 1.50 |
| Q9D6J5.1 | NADH dehydrogenase [ubiquinone] 1 beta subcomplex                    | 21.88  | 85163.7  | 76199.85 | 41604.85 | 2.05 | 1.83 |
| Q9D8N0.3 | Elongation factor 1-gamma                                            | 50.07  | 14973.95 | 13693.64 | 7328.63  | 2.04 | 1.87 |
| Q9D8W5.3 | 26S proteasome non-ATPase regulatory subunit 12                      | 52.89  | 2040.16  | 1542.66  | 1001.51  | 2.04 | 1.54 |

|             |                                                                    |        |           |           |          |      |      |
|-------------|--------------------------------------------------------------------|--------|-----------|-----------|----------|------|------|
| Q9D1D4.1    | Transmembrane emp24 domain-containing protein 10                   | 24.91  | 26131.54  | 28220.69  | 12861.44 | 2.03 | 2.19 |
| P51150.2    | Ras-related protein Rab-7a                                         | 23.49  | 19644.83  | 16384.81  | 9671.15  | 2.03 | 1.69 |
| P97797.1    | Tyrosine-protein phosphatase non-receptor type substrate 1         | 56.43  | 71413.48  | 57840.74  | 35188.13 | 2.03 | 1.64 |
| P63054.2    | Purkinje cell protein 4                                            | 6.81   | 61584.66  | 48910.5   | 30402.27 | 2.03 | 1.61 |
| P0CG50.1    | Polyubiquitin-C                                                    | 82.56  | 21790.16  | 16924.85  | 10830.92 | 2.01 | 1.56 |
| Q9WUL7.1    | ADP-ribosylation factor-like protein 3                             | 20.49  | 10450.59  | 11886.85  | 5214.42  | 2.00 | 2.28 |
| P63280.1    | Ubiquitin-protein ligase I                                         | 18.01  | 48897.98  | 44915.38  | 24437.56 | 2.00 | 1.84 |
| P43274.2    | Histone H1.4                                                       | 21.98  | 21633.45  | 17193.17  | 10823.97 | 2.00 | 1.59 |
| Q8BH59.1    | Calcium-binding mitochondrial carrier protein Aralar1              | 74.58  | 4783.69   | 7874.89   | 2394.67  | 2.00 | 3.29 |
| Q03958.1    | Prefoldin subunit 6                                                | 14.46  | 11900.85  | 7857.78   | 5960.63  | 2.00 | 1.32 |
| P20152.3    | Vimentin                                                           | 53.7   | 41449.78  | 32913.89  | 20784.81 | 1.99 | 1.58 |
| Q9R1Q8.1    | Transgelin-3                                                       | 22.48  | 69829.04  | 51916.29  | 35198.74 | 1.98 | 1.47 |
| P20065.1    | Thymosin beta-4                                                    | 5.68   | 23584.77  | 23226.22  | 11910.68 | 1.98 | 1.95 |
| Q61147.2    | Ceruloplasmin                                                      | 121.17 | 33196.12  | 27672.44  | 16774.19 | 1.98 | 1.65 |
| Q68FD5.3    | Clathrin heavy chain 1                                             | 191.59 | 30073.01  | 27019.77  | 15309.69 | 1.96 | 1.76 |
| O70493.1    | Sorting nexin-12                                                   | 19.12  | 686.1     | 0         | 350.24   | 1.96 | 0.00 |
| Q9EQU5.1    | Phosphatase 2A inhibitor                                           | 33.38  | 5218.94   | 3714.61   | 2666.81  | 1.96 | 1.39 |
| O08997.1    | Copper transport protein ATOX1                                     | 7.34   | 16926.39  | 13795.21  | 8679.53  | 1.95 | 1.59 |
| Q9DCG9.1    | tRNA methyltransferase 112 homolog                                 | 14.14  | 2933.51   | 2278.27   | 1504.91  | 1.95 | 1.51 |
| Q9CQ69.3    | Cytochrome b-c1 complex subunit 8                                  | 9.77   | 74746.83  | 80168.45  | 38373.88 | 1.95 | 2.09 |
| BAD32303.1  | U5 snRNP-specific protein, 200 kDa                                 | 218.46 | 3063.08   | 2424.85   | 1572.61  | 1.95 | 1.54 |
| Q9JMG7.2    | Hepatoma-derived growth factor-related protein 3                   | 22.43  | 28653.24  | 18937.84  | 14790.13 | 1.94 | 1.28 |
| Q9JMF3.1    | Guanine nucleotide-binding protein G(I)/G(S)/G(O) subunit gamma-13 | 7.98   | 21028.57  | 26516.14  | 10898.77 | 1.93 | 2.43 |
| P61957.1    | Sentrin-2                                                          | 10.87  | 52827.5   | 39148.29  | 27390.14 | 1.93 | 1.43 |
| Q9D6J6.2    | NADH dehydrogenase [ubiquinone] flavoprotein 2, mitochondrial      | 27.29  | 106751.46 | 102979.25 | 55413.42 | 1.93 | 1.86 |
| P14148.2    | 60S ribosomal protein L7                                           | 31.42  | 19798.92  | 17053.22  | 10345.53 | 1.91 | 1.65 |
| P80315.3    | T-complex protein 1 subunit delta                                  | 58.08  | 9382.08   | 9893.17   | 4903.91  | 1.91 | 2.02 |
| XP_908833.1 | PREDICTED: hypothetical protein                                    | 9.17   | 6028.88   | 5151.2    | 3154.36  | 1.91 | 1.63 |
| P34884.2    | Macrophage migration inhibitory factor                             | 12.51  | 18097.33  | 15500.36  | 9499.3   | 1.91 | 1.63 |
| Q9CQI6.3    | Coactosin-like protein                                             | 15.95  | 46954.08  | 45392.29  | 24665.27 | 1.90 | 1.84 |
| P70349.3    | Histidine triad nucleotide-binding protein 1                       | 13.78  | 43688.86  | 34949.41  | 22967.74 | 1.90 | 1.52 |
| Q62376.2    | U1 small nuclear ribonucleoprotein 70 kDa                          | 52     | 19556.59  | 14084.23  | 10283.12 | 1.90 | 1.37 |
| Q8VIJ6.1    | Polypyrimidine tract-binding protein-associated-splicing factor    | 75.46  | 39939.22  | 35071.67  | 21038.17 | 1.90 | 1.67 |
| Q01853.4    | Transitional endoplasmic reticulum ATPase                          | 89.33  | 17116.24  | 13365.85  | 9016.46  | 1.90 | 1.48 |
| Q62277.2    | Synaptophysin                                                      | 34.03  | 12647.27  | 10614.29  | 6678.26  | 1.89 | 1.59 |
| P62880.3    | G protein subunit beta-2                                           | 37.34  | 1119.2    | 1084.35   | 592.44   | 1.89 | 1.83 |
| Q9D855.3    | Cytochrome b-c1 complex subunit 7                                  | 13.53  | 1087.01   | 2974.89   | 575.81   | 1.89 | 5.17 |
| Q61012.3    | Transducin gamma chain                                             | 8.53   | 47134.33  | 27350.48  | 24968.48 | 1.89 | 1.10 |

|                      |                                                                  |         |          |          |          |      |      |
|----------------------|------------------------------------------------------------------|---------|----------|----------|----------|------|------|
| Q8CAQ8.1             | Mitochondrial inner membrane protein                             | 83.92   | 15735.29 | 14865.82 | 8337.12  | 1.89 | 1.78 |
| Q920Q6.1             | RNA-binding protein Musashi homolog 2                            | 36.94   | 1864.22  | 3017.86  | 992.9    | 1.88 | 3.04 |
| Q8BLO9.2             | Cell adhesion molecule 2                                         | 47.57   | 14663.47 | 12199.77 | 7810.85  | 1.88 | 1.56 |
| P38647.2             | Peptide-binding protein 74                                       | 73.54   | 54364.26 | 38369.39 | 28964.07 | 1.88 | 1.32 |
| Q9D6F9.3             | Tubulin beta-4 chain                                             | 49.59   | 12066.33 | 10843.03 | 6452.26  | 1.87 | 1.68 |
| P97300.3             | Neuroplastin                                                     | 44.38   | 5595.54  | 5651.95  | 3002.91  | 1.86 | 1.88 |
| P54227.2             | Stathmin                                                         | 17.28   | 13359.48 | 9304.18  | 7169.57  | 1.86 | 1.30 |
| P14685.2             | 26S proteasome non-ATPase regulatory subunit 3                   | 60.71   | 1661.24  | 1442.63  | 891.73   | 1.86 | 1.62 |
| P50096.1<br>P24547.2 | Inosine 5'-phosphate dehydrogenase 1                             | 55.3    | 17257.56 | 15977.3  | 9276.68  | 1.86 | 1.72 |
| Q7TSJ2.2             | Microtubule-associated protein 6                                 | 96.47   | 23470.8  | 19422.44 | 12620.64 | 1.86 | 1.54 |
| Q6ZWY9.3             | Histone H2B type 1-C/E/G                                         | 13.91   | 27152.88 | 22907.85 | 14621.14 | 1.86 | 1.57 |
| O55131.1             | Histone H2B type 1                                               | 13.91   | 24815.05 | 23585.05 | 13363.01 | 1.86 | 1.76 |
| Q9WUK2.3             | Septin-7                                                         | 50.56   | 34754.01 | 21874.84 | 18750.79 | 1.85 | 1.17 |
| Q8R5M8.2             | Synaptic cell adhesion molecule                                  | 49.8    | 38995.5  | 35280.41 | 21059.72 | 1.85 | 1.68 |
| P84104.1             | Serine/arginine-rich splicing factor 3                           | 19.33   | 22595.27 | 18262.77 | 12273.86 | 1.84 | 1.49 |
| P56480.2             | ATP synthase subunit beta, mitochondrial                         | 56.31   | 14904.78 | 12004.18 | 8127.91  | 1.83 | 1.48 |
| P14873.1             | Microtubule-associated protein 1B                                | 270.45  | 7455.59  | 3066.67  | 4084.43  | 1.83 | 0.75 |
| P10605.2             | Cathepsin B                                                      | 37.28   | 9542.57  | 9508.83  | 5236.01  | 1.82 | 1.82 |
| P15532.1             | Non-metastatic cells 1, protein                                  | 17.21   | 46204.19 | 46121.48 | 25368.7  | 1.82 | 1.82 |
| Q5SUF2.1             | Luc7-like protein 3                                              | 51.46   | 27012.38 | 31168.24 | 14850.31 | 1.82 | 2.10 |
| P26645.2             | Myristoylated alanine-rich C-kinase substrate                    | 29.67   | 55104.61 | 55970.03 | 30349.39 | 1.82 | 1.84 |
| Q9WUR9.1             | Adenylate kinase isoenzyme 4, mitochondrial                      | 25.07   | 5276.74  | 3011.77  | 2907.46  | 1.81 | 1.04 |
| O35295.3             | Transcriptional activator protein Pur-beta                       | 33.91   | 14033.17 | 12211.29 | 7796.52  | 1.80 | 1.57 |
| P84086.1             | Serine/arginine-rich splicing factor 3                           | 19.33   | 7502.4   | 4899.99  | 4181.97  | 1.79 | 1.17 |
| P28652.2             | Calcium/calmodulin-dependent protein kinase type II subunit beta | 60.47   | 3732.65  | 4002.57  | 2088.98  | 1.79 | 1.92 |
| Q9CWF2.1             | Tubulin beta-2B chain                                            | 49.96   | 10357.28 | 9040.29  | 5797.65  | 1.79 | 1.56 |
| P39053.2             | Dynamin 1                                                        | 91.72   | 22530.46 | 26063.14 | 12692.15 | 1.78 | 2.05 |
| Q9CQI7.1             | U2 small nuclear ribonucleoprotein B                             | 25.33   | 5270.26  | 6128.46  | 2983.55  | 1.77 | 2.05 |
| Q8R0A5.2             | Transcription elongation factor A (SII)-like 3                   | 22.47   | 6879.23  | 8330.04  | 3904.74  | 1.76 | 2.13 |
| P56959.1             | RNA-binding protein FUS                                          | 52.69   | 19283.12 | 29711.55 | 10951.47 | 1.76 | 2.71 |
| P42932.3             | Chaperonin containing Tcp1, subunit 8 (theta)                    | 59.56   | 9795.18  | 4975.56  | 5570.11  | 1.76 | 0.89 |
| Q6PIC6.1             | Sodium/potassium-transporting ATPase subunit alpha-3             | 111.71  | 41780.86 | 47943.94 | 23815.83 | 1.75 | 2.01 |
| P56135.3             | ATP synthase subunit f, mitochondrial                            | 10.34   | 42151.19 | 38903.19 | 24057.29 | 1.75 | 1.62 |
| P11499.2             | Heat shock protein HSP 90-beta                                   | 83.34   | 21465.34 | 23544.34 | 12258.12 | 1.75 | 1.92 |
| Q91VR5.1             | ATP-dependent RNA helicase DDX1                                  | 82.51   | 32706.96 | 26858.72 | 18696.5  | 1.75 | 1.44 |
| A2ASS6.1             | Titin                                                            | 3906.95 | 66578.7  | 63552.6  | 38074.62 | 1.75 | 1.67 |
| P62827.3             | GTP-binding nuclear protein Ran                                  | 24.43   | 10128.7  | 9529.51  | 5794.65  | 1.75 | 1.64 |

|          |                                                                 |        |           |           |           |      |      |
|----------|-----------------------------------------------------------------|--------|-----------|-----------|-----------|------|------|
| Q99LY9.3 | NADH dehydrogenase [ubiquinone] iron-sulfur protein 5;          | 12.65  | 6317.35   | 6256.09   | 3617.94   | 1.75 | 1.73 |
| Q8CHC4.3 | Synaptojanin-1                                                  | 172.65 | 31978.7   | 23194.96  | 18497.19  | 1.73 | 1.25 |
| Q60932.3 | Outer mitochondrial membrane protein porin 1                    | 32.36  | 98276.57  | 133282.64 | 56922.64  | 1.73 | 2.34 |
| P13595.3 | Neural cell adhesion molecule 1                                 | 119.44 | 4755.41   | 5540.99   | 2764.41   | 1.72 | 2.00 |
| Q61316.1 | Heat shock 70 kDa protein 4                                     | 94.15  | 7990.89   | 7720.77   | 4646.28   | 1.72 | 1.66 |
| Q60864.1 | Stress-induced-phosphoprotein 1                                 | 62.59  | 11414.24  | 10953.5   | 6664.58   | 1.71 | 1.64 |
| Q9JJK7.2 | Tropomodulin-2                                                  | 39.52  | 518.85    | 0         | 303.68    | 1.71 | 0.00 |
| Q8R081.2 | Heterogeneous nuclear ribonucleoprotein L                       | 63.97  | 1860.29   | 1008.37   | 1089.46   | 1.71 | 0.93 |
| P63085.3 | Mitogen-activated protein kinase 1                              | 41.28  | 6838.61   | 7231.72   | 4005.4    | 1.71 | 1.81 |
| Q8K310.1 | Matrin-3                                                        | 94.65  | 48934.68  | 44054.5   | 28726.06  | 1.70 | 1.53 |
| P70333.1 | Heterogeneous nuclear ribonucleoprotein H2                      | 49.29  | 3343.55   | 3199.39   | 1967.64   | 1.70 | 1.63 |
| Q60930.2 | Outer mitochondrial membrane protein porin 2                    | 31.74  | 86322.81  | 78898.69  | 50823.75  | 1.70 | 1.55 |
| P62631.1 | Elongation factor 1-alpha 2                                     | 50.46  | 29324.97  | 23360.65  | 17292.01  | 1.70 | 1.35 |
| P48962.4 | Adenine nucleotide translocator 1                               | 32.91  | 21196.68  | 26120.94  | 12531.9   | 1.69 | 2.08 |
| Q9CPQ1.3 | Cytochrome c oxidase polypeptide Vic                            | 8.47   | 26138.95  | 25535.01  | 15501.89  | 1.69 | 1.65 |
| Q6IRU5.1 | Clathrin light chain B                                          | 25.18  | 9545.47   | 5788.11   | 5698.24   | 1.68 | 1.02 |
| P68372.1 | Tubulin beta-2C chain                                           | 49.84  | 55580.54  | 58988.21  | 33302.34  | 1.67 | 1.77 |
| P00493.3 | Hypoxanthine-guanine phosphoribosyltransferase                  | 24.57  | 5037.01   | 3204.2    | 3022.5    | 1.67 | 1.06 |
| Q78ZA7.1 | Nucleosome assembly protein 1-like 4                            | 42.68  | 4688.42   | 0         | 2813.33   | 1.67 | 0.00 |
| P97450.1 | ATP synthase-coupling factor 6                                  | 12.5   | 9580.5    | 10919.41  | 5756.27   | 1.66 | 1.90 |
| Q64433.2 | Chaperonin 10                                                   | 10.96  | 42888.72  | 36324.86  | 25830.45  | 1.66 | 1.41 |
| O54774.1 | Delta-adaptin                                                   | 135.1  | 11197.1   | 8886.57   | 6781.64   | 1.65 | 1.31 |
| P62823.1 | Ras-related protein Rab-3C                                      | 25.88  | 24501.54  | 22919.68  | 14860.55  | 1.65 | 1.54 |
| Q9CZC8.1 | Secernin-1.                                                     | 46.33  | 2759.81   | 5907.6    | 1674.48   | 1.65 | 3.53 |
| Q8VDQ1.2 | Prostaglandin reductase 2                                       | 38.02  | 2668.12   | 2954.5    | 1623.99   | 1.64 | 1.82 |
| Q99LX0.1 | Parkinson disease protein 7 homolog                             | 20.02  | 27806.41  | 24268.5   | 16926.18  | 1.64 | 1.43 |
| Q9D1L0.1 | Coiled-coil-helix-coiled-coil-helix domain-containing protein 2 | 15.57  | 14434.87  | 12695.1   | 8793.22   | 1.64 | 1.44 |
| O55022.4 | Membrane-associated progesterone receptor component 1           | 21.7   | 11051.6   | 12019.41  | 6764.49   | 1.63 | 1.78 |
| P26883.2 | Immunophilin FKBP12                                             | 11.92  | 21108.04  | 22461.28  | 12930.49  | 1.63 | 1.74 |
| O54828.2 | Regulator of G-protein signaling 9                              | 76.99  | 9064.08   | 9212.2    | 5554.58   | 1.63 | 1.66 |
| P42669.1 | Purine-rich single-stranded DNA-binding protein alpha           | 34.89  | 24853.18  | 30339.65  | 15255.83  | 1.63 | 1.99 |
| Q3UEB3.2 | Poly(U)-binding-splicing factor PUF60                           | 60.26  | 7668.19   | 7520.47   | 4718.72   | 1.63 | 1.59 |
| P99027.3 | 60S acidic ribosomal protein P2                                 | 11.65  | 87858.26  | 96569.94  | 54072.75  | 1.62 | 1.79 |
| Q9R0P5.3 | Dextrin                                                         | 18.52  | 16021.47  | 13597.53  | 9861.98   | 1.62 | 1.38 |
| Q62188.1 | Dihydropyrimidinase-related protein 3                           | 34.13  | 177946.48 | 191194.91 | 109786.19 | 1.62 | 1.74 |
| Q9DCN2.3 | NADH-cytochrome b5 reductase 3                                  | 34.13  | 52600.13  | 58693.28  | 32584.27  | 1.61 | 1.80 |
| P57722.3 | Poly(rC)-binding protein 3                                      | 39.3   | 20374.21  | 22930.49  | 12671.46  | 1.61 | 1.81 |
| O08583.3 | Transcriptional coactivator Aly/REF                             | 26.95  | 13729.9   | 11776.16  | 8552.98   | 1.61 | 1.38 |

|          |                                                  |        |           |           |           |      |      |
|----------|--------------------------------------------------|--------|-----------|-----------|-----------|------|------|
| P14211.1 | Calreticulin                                     | 48     | 7535.68   | 7777.7    | 4707.23   | 1.60 | 1.65 |
| Q8BVQ5.5 | Protein phosphatase methylesterase 1             | 46.26  | 24915.76  | 23615.71  | 15587.46  | 1.60 | 1.52 |
| Q8CGF7.2 | Transcription elongation regulator 1             | 123.81 | 12884.63  | 14266.85  | 8066.45   | 1.60 | 1.77 |
| Q9JKF6.2 | Nectin-1                                         | 57.07  | 14195.45  | 11834.21  | 8895.24   | 1.60 | 1.33 |
| P70168.1 | Importin subunit beta-1                          | 97.17  | 12313.79  | 4994.65   | 7720.5    | 1.59 | 0.65 |
| P62317.1 | Small nuclear ribonucleoprotein Sm D2            | 13.53  | 15219.46  | 17472.35  | 9553.65   | 1.59 | 1.83 |
| Q8VDN2.1 | Sodium pump subunit alpha-1                      | 113    | 30068.42  | 24697.92  | 18882.26  | 1.59 | 1.31 |
| P63017.1 | Heat shock 70 kDa protein 8                      | 70.88  | 14470.35  | 12534.41  | 9114.09   | 1.59 | 1.38 |
| Q61474.1 | RNA-binding protein Musashi homolog 1            | 39.12  | 2114.43   | 1358.98   | 1331.82   | 1.59 | 1.02 |
| Q9DCJ5.3 | NADH-ubiquinone oxidoreductase 19 kDa subunit    | 20     | 1523.44   | 2674.17   | 961.22    | 1.58 | 2.78 |
| P27773.2 | Protein disulfide-isomerase A3                   | 56.68  | 6861.44   | 8210.18   | 4330.56   | 1.58 | 1.90 |
| P62962.2 | Profilin-1                                       | 14.96  | 3530.21   | 3465.59   | 2229.31   | 1.58 | 1.55 |
| Q8BHN3.1 | Alpha-glucosidase 2                              | 106.93 | 1737.55   | 2790.24   | 1102.03   | 1.58 | 2.53 |
| Q9CQQ7.1 | ATPase subunit b                                 | 28.95  | 19804.66  | 18395.54  | 12581.66  | 1.57 | 1.46 |
| P40142.1 | Transketolase                                    | 67.64  | 77250.12  | 78678.14  | 49097.62  | 1.57 | 1.60 |
| P29341.1 | Polyadenylate-binding protein 1                  | 70.66  | 11309.3   | 14966.56  | 7193.79   | 1.57 | 2.08 |
| O35098.1 | Dihydropyrimidinase-related protein 4            | 61.97  | 208125.05 | 196624.27 | 132442.27 | 1.57 | 1.48 |
| O08709.3 | Antioxidant protein 2                            | 24.87  | 5246.89   | 4804.71   | 3349.32   | 1.57 | 1.43 |
| P99024.1 | Tubulin beta-5 chain                             | 49.68  | 35732.88  | 31109.27  | 22835.09  | 1.56 | 1.36 |
| P63101.1 | Protein kinase C inhibitor protein 1             | 27.78  | 3925.91   | 5002.55   | 2509.35   | 1.56 | 1.99 |
| Q8R326.1 | Paraspeckle protein 1                            | 58.77  | 15636.72  | 17555.86  | 9997.11   | 1.56 | 1.76 |
| Q99104.1 | Myosin-Va                                        | 215.64 | 2885.22   | 3132.02   | 1846.2    | 1.56 | 1.70 |
| P60710.1 | Beta-actin                                       | 41.74  | 14159.48  | 14878.57  | 9068.1    | 1.56 | 1.64 |
| Q9JM14.1 | 5' 3'-deoxyribonucleotidase                      | 23.08  | 10756.7   | 10583.3   | 6890.03   | 1.56 | 1.54 |
| Q60737.1 | Casein kinase II subunit alpha                   | 45.17  | 48913.69  | 56470.19  | 31384.08  | 1.56 | 1.80 |
| P31938.2 | MAPK/ERK kinase 1                                | 43.48  | 2660.71   | 4882.98   | 1709.81   | 1.56 | 2.86 |
| P35979.2 | 60S ribosomal protein L12                        | 17.81  | 9899.08   | 9495.12   | 6364.3    | 1.56 | 1.49 |
| Q91WV0.1 | TATA-binding protein-associated phosphoprotein   | 19.44  | 3866.73   | 645.47    | 2495.65   | 1.55 | 0.26 |
| Q64471.3 | Glutathione S-transferase theta-1                | 27.38  | 7325.74   | 4851.39   | 4736.34   | 1.55 | 1.02 |
| Q91WN1.2 | DnaJ homolog subfamily C member 9                | 30.07  | 9359.23   | 5213.03   | 6074.63   | 1.54 | 0.86 |
| P12660.2 | Purkinje cell protein 2                          | 13.06  | 3854.11   | 3683.36   | 2503.09   | 1.54 | 1.47 |
| Q8CG79.3 | Tumor suppressor p53-binding protein 2           | 125.33 | 58566.52  | 64441.6   | 38069.02  | 1.54 | 1.69 |
| P32020.3 | Propanoyl-CoA C-acyltransferase                  | 59.14  | 16362.79  | 16477.86  | 10640.04  | 1.54 | 1.55 |
| Q99L47.1 | Hsc70-interacting protein                        | 41.66  | 18043.85  | 17094.99  | 11742.64  | 1.54 | 1.46 |
| Q9Z2R6.1 | Retinal protein 4                                | 27.01  | 7393.17   | 10256.57  | 4820.84   | 1.53 | 2.13 |
| Q9R1P3.1 | Proteasome component C7-I                        | 22.91  | 4910.59   | 4699.09   | 3203.38   | 1.53 | 1.47 |
| Q91WK5.1 | Glycine cleavage system H protein, mitochondrial | 18.59  | 29152.96  | 27278.55  | 19080.8   | 1.53 | 1.43 |
| P61082.1 | Ubiquitin-conjugating enzyme E2                  | 20.9   | 12344.41  | 12946.11  | 8094.97   | 1.52 | 1.60 |
| P28798.2 | Granulins                                        | 63.47  | 5032.19   | 3875.12   | 3302.48   | 1.52 | 1.17 |
| Q922R8.3 | Protein disulfide-isomerase A6                   | 48.11  | 14746.98  | 12496.35  | 9686.21   | 1.52 | 1.29 |

|          |                                                                       |       |           |           |           |      |      |
|----------|-----------------------------------------------------------------------|-------|-----------|-----------|-----------|------|------|
| P09411.4 | Phosphoglycerate kinase 1                                             | 44.55 | 112991.93 | 90902.56  | 74424.99  | 1.52 | 1.22 |
| P10852.1 | 4F2 cell-surface antigen heavy chain                                  | 58.35 | 3693.07   | 4069.42   | 2436.96   | 1.52 | 1.67 |
| Q8JZS0.2 | Protein lin-7 homolog A                                               | 26    | 3239.78   | 4791.91   | 2139.62   | 1.51 | 2.24 |
| P61979.1 | Heterogeneous nuclear ribonucleoprotein                               | 50.98 | 11238.96  | 13009.58  | 7423.2    | 1.51 | 1.75 |
| P50396.3 | Guanosine diphosphate dissociation inhibitor 1                        | 50.53 | 17940.1   | 22501.11  | 11851.35  | 1.51 | 1.90 |
| P05201.2 | Transaminase A                                                        | 46.24 | 67528.32  | 62905.48  | 44731.49  | 1.51 | 1.41 |
| P34022.2 | GTPase-activating protein                                             | 23.6  | 3153.38   | 2792.21   | 2090.1    | 1.51 | 1.34 |
| Q9Z1N5.1 | Spliceosome RNA helicase Bat1                                         | 49.04 | 7257.72   | 9968.06   | 4811.44   | 1.51 | 2.07 |
| P62897.2 | Cytochrome c, somatic                                                 | 11.61 | 8225.92   | 4164.29   | 5467.91   | 1.50 | 0.76 |
| P60879.1 | Synaptosomal-associated protein 25                                    | 23.32 | 3639.82   | 3829.28   | 2430.72   | 1.50 | 1.58 |
| P18572.2 | Basigin                                                               | 42.45 | 5095.64   | 5813.1    | 3412.28   | 1.49 | 1.70 |
| O88844.1 | Cytosolic NADP-isocitrate dehydrogenase                               | 46.67 | 62252.51  | 49546.74  | 41820.26  | 1.49 | 1.18 |
| Q61792.1 | Metastatic lymph node gene 50 protein                                 | 30    | 5081.66   | 1572.71   | 3415.22   | 1.49 | 0.46 |
| Q9D819.1 | Pyrophosphate phospho-hydrolase                                       | 32.67 | 29126.49  | 28322.49  | 19593.04  | 1.49 | 1.45 |
| Q8VEK3.1 | Heterogeneous nuclear ribonucleoprotein U                             | 87.93 | 14392.91  | 16403.8   | 9690.95   | 1.49 | 1.69 |
| P07901.4 | Heat shock protein HSP 90-alpha                                       | 84.8  | 80664.94  | 99180.67  | 54433.51  | 1.48 | 1.82 |
| Q9DBP5.1 | Cytidylate kinase                                                     | 22.17 | 8749.92   | 6077.56   | 5911.94   | 1.48 | 1.03 |
| Q9CQA3.1 | Succinate dehydrogenase [ubiquinone]                                  | 31.82 | 18010.69  | 15359.64  | 12206.96  | 1.48 | 1.26 |
| Q921F2.1 | TAR DNA-binding protein 43                                            | 44.56 | 8186.89   | 5153.05   | 5550.3    | 1.48 | 0.93 |
| P56376.2 | Acyolphosphatase-1                                                    | 11.24 | 7971.94   | 6495.26   | 5409.75   | 1.47 | 1.20 |
| Q64105.1 | Sepiapterin reductase                                                 | 27.89 | 6546.8    | 6620.97   | 4458.83   | 1.47 | 1.48 |
| Q62446.2 | Rotamase                                                              | 25.15 | 15403.87  | 16176.45  | 10503.48  | 1.47 | 1.54 |
| P29595.2 | Neural precursor cell expressed developmentally down-regulated gene 8 | 8.97  | 185547.49 | 207121.96 | 126530.28 | 1.47 | 1.64 |
| P01831.1 | Thymus cell antigen 1, theta                                          | 18.08 | 27970.82  | 27413.01  | 19123.86  | 1.46 | 1.43 |
| P19783.2 | Cytochrome c oxidase subunit IV isoform 1                             | 19.53 | 15764.39  | 21157.83  | 10779.69  | 1.46 | 1.96 |
| P97822.2 | Cerebellar postnatal development protein 1                            | 29.63 | 6064.33   | 6096.63   | 4165.62   | 1.46 | 1.46 |
| Q9D051.1 | Pyruvate dehydrogenase (lipoamide) beta                               | 38.94 | 11468.49  | 17632.54  | 7884.04   | 1.45 | 2.24 |
| P63011.1 | RAB3A, member RAS oncogene family                                     | 24.97 | 5337.77   | 5122.07   | 3678.3    | 1.45 | 1.39 |
| P17182.3 | Enolase 1, alpha non-neuron                                           | 47.15 | 89479.63  | 99464.56  | 61722.92  | 1.45 | 1.61 |
| Q93092.2 | Transaldolase                                                         | 37.39 | 3745.81   | 3236.11   | 2584.22   | 1.45 | 1.25 |
| Q9CR51.3 | Vacuolar proton pump subunit G 1                                      | 13.73 | 5820.25   | 4087.36   | 4022.92   | 1.45 | 1.02 |
| P62874.3 | Guanine nucleotide binding protein (G protein), beta 1                | 37.38 | 9712.35   | 7565.22   | 6728.06   | 1.44 | 1.12 |
| P35235.2 | Tyrosine-protein phosphatase non-receptor type 11                     | 68.47 | 1138.56   | 1393.79   | 789.24    | 1.44 | 1.77 |
| P06745.4 | Glucose phosphate isomerase 1                                         | 62.78 | 33157.72  | 34937.79  | 23038.51  | 1.44 | 1.52 |
| Q9D6Y7.1 | Peptide methionine sulfoxide reductase                                | 25.99 | 58098.3   | 53104.66  | 40378.19  | 1.44 | 1.32 |
| P16125.2 | L-lactate dehydrogenase B chain                                       | 36.58 | 26982.93  | 28990.51  | 18763.51  | 1.44 | 1.55 |

|          |                                                 |        |           |           |           |      |      |
|----------|-------------------------------------------------|--------|-----------|-----------|-----------|------|------|
| O88569.2 | Heterogeneous nuclear ribonucleoproteins A2/B1  | 37.41  | 4112.23   | 4152.28   | 2865.65   | 1.44 | 1.45 |
| P62821.3 | Ras-related protein Rab-1A                      | 22.68  | 4857.09   | 1138.5    | 3393.94   | 1.43 | 0.34 |
| P63038.1 | 60 kDa heat shock protein, mitochondrial        | 60.96  | 17767     | 15875.03  | 12421.1   | 1.43 | 1.28 |
| P09103.1 | Protein disulfide-isomerase                     | 57.15  | 7972.94   | 5698.07   | 5587.37   | 1.43 | 1.02 |
| P22599.2 | Alpha-1-antitrypsin 1-2                         | 45.98  | 2510.97   | 3139.86   | 1769.48   | 1.42 | 1.77 |
| P45376.3 | Aldose reductase                                | 35.74  | 6958.63   | 7688.68   | 4905.42   | 1.42 | 1.57 |
| O54751.1 | Cone-rod homeobox protein                       | 32.38  | 3951.83   | 1532.88   | 2793.16   | 1.41 | 0.55 |
| Q9D0S9.1 | Histidine triad nucleotide-binding protein-2    | 17.32  | 26859.14  | 22941.72  | 19006.88  | 1.41 | 1.21 |
| Q62348.1 | Translin                                        | 26.2   | 26684.04  | 37188.12  | 18964.83  | 1.41 | 1.96 |
| P10639.3 | Thioredoxin                                     | 11.68  | 6387.62   | 5411.65   | 4545.48   | 1.41 | 1.19 |
| Q9WVL4.1 | Rhodopsin kinase                                | 63.58  | 36829.11  | 52058.2   | 26252.03  | 1.40 | 1.98 |
| O08553.2 | Dihydropyrimidinase-related protein 2           | 62.29  | 300713.55 | 373455.2  | 214406.42 | 1.40 | 1.74 |
| P30275.1 | Acidic-type mitochondrial creatine kinase       | 47.01  | 23961.89  | 24792.58  | 17087.74  | 1.40 | 1.45 |
| P14206.4 | Laminin-binding protein precursor p40           | 32.84  | 7821.25   | 4091.14   | 5603.11   | 1.40 | 0.73 |
| P14733.3 | Lamin-B1                                        | 66.8   | 1013.6    | 1261.76   | 727.42    | 1.39 | 1.73 |
| Q60597.3 | Alpha-ketoglutarate dehydrogenase               | 116.47 | 10419.3   | 12397.87  | 7533.24   | 1.38 | 1.65 |
| Q9QYG0.1 | Protein Ndr2                                    | 40.8   | 33179.49  | 31349.76  | 23990.2   | 1.38 | 1.31 |
| P51863.2 | Vacuolar proton pump subunit d 1                | 40.31  | 3703.66   | 3037.91   | 2691.83   | 1.38 | 1.13 |
| P17183.2 | Enolase 2, gamma neuronal                       | 47.3   | 37228.59  | 41634.02  | 27184.15  | 1.37 | 1.53 |
| Q3URD3.2 | Sarcolemmal membrane-associated protein         | 96.96  | 7620.01   | 6381.27   | 5586.07   | 1.36 | 1.14 |
| Q3UM45.2 | Protein phosphatase 1 regulatory subunit 7      | 41.3   | 8161.75   | 10169.92  | 6017.19   | 1.36 | 1.69 |
| Q9CQ54.1 | NADH-ubiquinone oxidoreductase subunit B14.5b   | 14.17  | 3354.09   | 2670.5    | 2484.43   | 1.35 | 1.07 |
| Q8BFR5.1 | Tu translation elongation factor, mitochondrial | 49.51  | 41728.22  | 42180.87  | 31015.22  | 1.35 | 1.36 |
| Q60605.3 | Myosin light polypeptide 6                      | 16.93  | 1907.91   | 2661.39   | 1418.76   | 1.34 | 1.88 |
| Q03265.1 | ATP synthase subunit alpha, mitochondrial       | 59.76  | 16986.85  | 16121.47  | 12678.98  | 1.34 | 1.27 |
| Q9Z219.2 | Succinyl-CoA synthetase beta-A chain            | 50.12  | 14652.46  | 11873.55  | 10987.46  | 1.33 | 1.08 |
| P09671.3 | Superoxide dismutase [Mn], mitochondrial        | 24.61  | 2135.53   | 3495.57   | 1606.77   | 1.33 | 2.18 |
| Q99KJ8.3 | Dynactin subunit 2                              | 44.13  | 2744.04   | 2567.86   | 2064.91   | 1.33 | 1.24 |
| P12970.2 | 60S ribosomal protein L7a                       | 29.98  | 10759.2   | 8227.3    | 8110.56   | 1.33 | 1.01 |
| P11983.3 | T-complex protein 1                             | 60.64  | 16726.9   | 16281.2   | 12609.89  | 1.33 | 1.29 |
| P47955.1 | 60S acidic ribosomal protein P1                 | 11.48  | 5259.23   | 2601.44   | 3972.84   | 1.32 | 0.65 |
| P19157.2 | Glutathione S-transferase, pi 1                 | 23.61  | 12938.27  | 10921.71  | 9949.3    | 1.30 | 1.10 |
| P05064.2 | Fructose-bisphosphate aldolase A                | 39.36  | 130142.05 | 143286.62 | 100401.4  | 1.30 | 1.43 |
| Q64520.2 | Guanylate kinase                                | 21.92  | 33841.01  | 29421.94  | 26155.73  | 1.29 | 1.12 |
| Q62425.2 | NADH-ubiquinone oxidoreductase MLRQ subunit     | 9.33   | 18320.52  | 22522.85  | 14217.38  | 1.29 | 1.58 |
| Q9D1A2.1 | Cytosolic non-specific dipeptidase              | 52.77  | 7748.54   | 7261.38   | 6019.41   | 1.29 | 1.21 |
| P15105.6 | Glutamate-ammonia ligase                        | 42.13  | 28248.53  | 36378.68  | 21964.27  | 1.29 | 1.66 |
| Q9D0E1.3 | Heterogeneous nuclear                           | 77.66  | 1808.8    | 1457.77   | 1409.23   | 1.28 | 1.03 |

|          | ribonucleoprotein M                                                |        |          |          |          |      |      |
|----------|--------------------------------------------------------------------|--------|----------|----------|----------|------|------|
| P68369.1 | Tubulin alpha-1A chain                                             | 50.14  | 15041.45 | 15294.12 | 11753.3  | 1.28 | 1.30 |
| P99029.2 | Peroxiredoxin 5                                                    | 21.9   | 7299.97  | 9972.18  | 5712.35  | 1.28 | 1.75 |
| Q8BYK4.1 | Retinol dehydrogenase 12                                           | 35.3   | 13197.55 | 11735.13 | 10376.82 | 1.27 | 1.13 |
| Q571F8.2 | Glutaminase liver isoform, mitochondrial                           | 66.38  | 8573.18  | 12056.2  | 6789.99  | 1.26 | 1.78 |
| O35887.1 | Calumenin                                                          | 37.07  | 5498.17  | 2191.33  | 4402.12  | 1.25 | 0.50 |
| P07146.1 | Anionic trypsin-2                                                  | 26.21  | 78395.48 | 90151.73 | 62846.88 | 1.25 | 1.43 |
| Q8BMF4.2 | Pyruvate dehydrogenase complex component E2                        | 67.95  | 5880.73  | 9780.67  | 4716.56  | 1.25 | 2.07 |
| Q91X78.1 | Endoplasmic reticulum lipid raft-associated protein 1              | 38.94  | 18463.32 | 17382.82 | 14889.94 | 1.24 | 1.17 |
| Q61171.3 | Peroxiredoxin 2                                                    | 21.78  | 10190.91 | 17519.27 | 8254.84  | 1.23 | 2.12 |
| Q11011.2 | Puromycin-sensitive aminopeptidase                                 | 103.34 | 11016.61 | 12161.7  | 8923.92  | 1.23 | 1.36 |
| P27664.2 | Aminopeptidase puromycin sensitive                                 | 103.34 | 13383    | 14510.94 | 10842.32 | 1.23 | 1.34 |
| Q8BG39.1 | Synaptic vesicle glycoprotein 2B                                   | 77.47  | 14708.68 | 15834.34 | 11922.58 | 1.23 | 1.33 |
| O35737.3 | Heterogeneous nuclear ribonucleoprotein H                          | 49.21  | 2310.32  | 3351.9   | 1889.58  | 1.22 | 1.77 |
| Q62420.2 | Endophilin-A1                                                      | 39.96  | 2207.99  | 3438.56  | 1808.09  | 1.22 | 1.90 |
| P45952.1 | Medium-chain specific acyl-CoA dehydrogenase, mitochondrial        | 46.49  | 7626.89  | 4850.89  | 6273.68  | 1.22 | 0.77 |
| Q60714.1 | Long-chain fatty acid transport protein 1                          | 71.29  | 4208.7   | 4568.6   | 3489.35  | 1.21 | 1.31 |
| P00920.4 | Carbonic anhydrase 2                                               | 29.04  | 11325.84 | 18471.31 | 9392.62  | 1.21 | 1.97 |
| Q61696.2 | Heat shock protein 1A                                              | 70.09  | 1972.17  | 0        | 1636.83  | 1.20 | 0.00 |
| Q9D0F9.3 | Phosphoglucomutase-1                                               | 61.53  | 6687.21  | 5064.92  | 5556.76  | 1.20 | 0.91 |
| Q91VD9.1 | NADH-ubiquinone oxidoreductase 75 kDa subunit, mitochondrial       | 79.76  | 6417.38  | 7355.6   | 5380.8   | 1.19 | 1.37 |
| Q9D6R2.1 | Isocitric dehydrogenase subunit alpha                              | 39.64  | 33801.36 | 28495.38 | 28364.91 | 1.19 | 1.00 |
| Q99K48.3 | Non-POU domain-containing octamer-binding protein                  | 54.56  | 3841.4   | 4379.54  | 3233.17  | 1.19 | 1.35 |
| Q9CPU0.3 | Lactoylglutathione lyase                                           | 20.81  | 9702.19  | 8809.41  | 8182.49  | 1.19 | 1.08 |
| Q9CQM5.1 | Thioredoxin domain-containing protein 17                           | 14.02  | 9535.02  | 7485.09  | 8054.14  | 1.18 | 0.93 |
| Q80WM3.2 | Complexin 4                                                        | 18.36  | 43171.76 | 47546.18 | 36523.2  | 1.18 | 1.30 |
| Q08331.3 | Calretinin                                                         | 31.38  | 11400.82 | 13544.94 | 9655.38  | 1.18 | 1.40 |
| Q9CWS0.3 | Dimethylarginine dimethylaminohydrolase 1                          | 31.39  | 19661.55 | 31054.02 | 16734.91 | 1.17 | 1.86 |
| P05202.1 | Aspartate aminotransferase, mitochondrial                          | 47.42  | 16022.53 | 25993.13 | 13714.14 | 1.17 | 1.90 |
| P51881.3 | Adenine nucleotide translocator 2                                  | 32.94  | 13039.84 | 18347.63 | 11244.75 | 1.16 | 1.63 |
| P17182.3 | Alpha-enolase                                                      | 47.15  | 30401.58 | 37549.48 | 26401.05 | 1.15 | 1.42 |
| Q63844.5 | Mitogen-activated protein kinase 3                                 | 43.07  | 3787.21  | 5974.11  | 3290.31  | 1.15 | 1.82 |
| P08249.3 | Malate dehydrogenase, mitochondrial                                | 35.62  | 39858.12 | 54041.01 | 34632.58 | 1.15 | 1.56 |
| Q91VM9.1 | Inorganic pyrophosphatase 2, mitochondrial                         | 38.12  | 5656.03  | 8371.48  | 4950.29  | 1.14 | 1.69 |
| Q61017.2 | Guanine nucleotide-binding protein G(I)/G(S)/G(O) subunit gamma-T2 | 7.8    | 7868.12  | 9830.85  | 6962.25  | 1.13 | 1.41 |
| P62881.1 | Guanine nucleotide-binding protein subunit beta-5                  | 43.57  | 3960.64  | 3772.86  | 3533.84  | 1.12 | 1.07 |
| Q8VEM8.1 | Phosphate transport protein                                        | 39.64  | 12821.19 | 14855.94 | 11473.91 | 1.12 | 1.29 |



|          |                                                                          |        |          |          |          |      |      |
|----------|--------------------------------------------------------------------------|--------|----------|----------|----------|------|------|
| Q9D2M8.4 | Ubiquitin-conjugating enzyme E2 variant 2                                | 16.37  | 13706.92 | 12773.49 | 12273.67 | 1.12 | 1.04 |
| Q9CR16.3 | Peptidyl-prolyl cis-trans isomerase                                      | 40.75  | 11367.57 | 14524.91 | 10278.29 | 1.11 | 1.41 |
| Q9CPV4.1 | Glyoxalase domain-containing protein 4                                   | 33.32  | 26094.13 | 25860.82 | 23895.45 | 1.09 | 1.08 |
| P14824.2 | Annexin A6                                                               | 75.9   | 17868.48 | 24073.34 | 16448.4  | 1.09 | 1.46 |
| Q8K2B3.1 | Succinate dehydrogenase [ubiquinone] flavoprotein subunit, mitochondrial | 72.6   | 4771.37  | 4594.93  | 4393.63  | 1.09 | 1.05 |
| Q9DCX2.3 | ATP synthase subunit d, mitochondrial                                    | 18.75  | 1510.36  | 2670.28  | 1399     | 1.08 | 1.91 |
| Q9D0M5.1 | Dynein light chain LC8-type 2                                            | 10.35  | 6620.99  | 12958.48 | 6204.44  | 1.07 | 2.09 |
| P56391.2 | Cytochrome c oxidase subunit 6B1                                         | 10.07  | 9972.81  | 15618.63 | 9357.85  | 1.07 | 1.67 |
| P32958.1 | Rod outer segment membrane protein 1                                     | 37.27  | 22465.26 | 30953.78 | 21106.48 | 1.06 | 1.47 |
| P05063.4 | Fructose-bisphosphate aldolase C                                         | 39.4   | 6499.43  | 9860.58  | 6124.04  | 1.06 | 1.61 |
| Q9D3D9.1 | ATP synthase subunit delta, mitochondrial                                | 17.6   | 7337.19  | 5390.94  | 6920.98  | 1.06 | 0.78 |
| P97807.2 | Fumarate hydratase, mitochondrial                                        | 54.38  | 1403.72  | 1709.05  | 1327.29  | 1.06 | 1.29 |
| P34057.2 | Rocoverin                                                                | 23.41  | 6000.89  | 3383.9   | 5698.58  | 1.05 | 0.59 |
| Q9J16.3  | Aldehyde reductase                                                       | 36.59  | 5173.92  | 4216.2   | 4922.57  | 1.05 | 0.86 |
| B2RUR4.1 | Keratinocyte proline-rich protein                                        | 71.76  | 4134.9   | 4697.1   | 3942.26  | 1.05 | 1.19 |
| P20443.1 | Retinal S-antigen                                                        | 44.94  | 6716.54  | 7305.05  | 6408.57  | 1.05 | 1.14 |
| Q61548.1 | Clathrin coat assembly protein AP180                                     | 91.86  | 1109.56  | 1831.02  | 1086.51  | 1.02 | 1.69 |
| Q9CZU6.1 | Citrate synthase, mitochondrial                                          | 51.74  | 1706.97  | 2583.13  | 1698.95  | 1.00 | 1.52 |
| Q9DCD0.3 | 6-phosphogluconate dehydrogenase                                         | 53.26  | 2557.77  | 2393.5   | 2555.71  | 1.00 | 0.94 |
| Q8K4Z3.1 | Apolipoprotein A-I-binding protein                                       | 30.98  | 5764.64  | 6719.28  | 5803.97  | 0.99 | 1.16 |
| P15409.1 | Rhodopsin                                                                | 39.03  | 3841.49  | 1350.52  | 3880.86  | 0.99 | 0.35 |
| P05213.2 | Tubulin alpha-1B chain                                                   | 50.16  | 3509.66  | 5144.37  | 3549.35  | 0.99 | 1.45 |
| Q9CQF3.1 | Cleavage and polyadenylation specificity factor subunit 5                | 26.25  | 3500.06  | 3366.52  | 3542.51  | 0.99 | 0.95 |
| P48758.3 | NADPH-dependent carbonyl reductase 1                                     | 30.65  | 6581.27  | 8582.09  | 6710.76  | 0.98 | 1.28 |
| P48036.1 | Annexin A5                                                               | 35.76  | 6910.18  | 12702.26 | 7061.86  | 0.98 | 1.80 |
| Q9DCW4.3 | Electron transfer flavoprotein subunit beta                              | 27.63  | 23899.34 | 21540.07 | 24434.28 | 0.98 | 0.88 |
| Q60597.3 | 2-oxoglutarate dehydrogenase complex component E1                        | 116.47 | 4333.8   | 2059.44  | 4451.95  | 0.97 | 0.46 |
| Q00612.3 | Glucose-6-phosphate 1-dehydrogenase X                                    | 59.27  | 1232.65  | 1333.69  | 1267.91  | 0.97 | 1.05 |
| P68368.1 | Tubulin alpha-4A chain                                                   | 49.93  | 6161.89  | 6373.54  | 6344.18  | 0.97 | 1.00 |
| Q9JKD3.1 | Secretory carrier-associated membrane protein 5                          | 26.07  | 7445.48  | 14437.68 | 7743.27  | 0.96 | 1.86 |
| P62075.1 | Mitochondrial import inner membrane translocase subunit Tim13            | 10.46  | 1843.96  | 2322.47  | 1963.04  | 0.94 | 1.18 |
| Q91X72.1 | Hemopexin                                                                | 51.35  | 2569.45  | 3519.17  | 2745.19  | 0.94 | 1.28 |
| P17751.3 | Triosephosphate isomerase                                                | 26.72  | 981.78   | 1724.97  | 1073.81  | 0.91 | 1.61 |
| P09405.2 | Nucleolin                                                                | 76.73  | 4400.33  | 9552.07  | 4848.27  | 0.91 | 1.97 |
| P52480.4 | Pyruvate kinase muscle isozyme M1/M2                                     | 57.85  | 6007.47  | 12319.36 | 6886.53  | 0.87 | 1.79 |
| P61922.1 | 4-aminobutyrate aminotransferase,                                        | 56.46  | 8809.67  | 6029     | 10181.14 | 0.87 | 0.59 |

|          | mitochondrial                                                                     |        |          |          |          |      |      |
|----------|-----------------------------------------------------------------------------------|--------|----------|----------|----------|------|------|
| Q61598.1 | Guanosine diphosphate dissociation inhibitor 2                                    | 50.54  | 1304.01  | 985.2    | 1512.37  | 0.86 | 0.65 |
| P49194.3 | Retinol-binding protein 3                                                         | 134.47 | 35269.07 | 22790.55 | 40972.94 | 0.86 | 0.56 |
| P67778.1 | Prohibitin                                                                        | 29.83  | 2679.38  | 2747.24  | 3130.95  | 0.86 | 0.88 |
| Q9CZ44.1 | p97 cofactor p47                                                                  | 40.72  | 1029.14  | 0        | 1268.66  | 0.81 | 0.00 |
| P09174.1 | Retinal rod rhodopsin-sensitive cGMP 3',5'-cyclic phosphodiesterase subunit gamma | 9.64   | 7662.38  | 9130.51  | 9575.94  | 0.80 | 0.95 |
| P52503.2 | NADH-ubiquinone oxidoreductase 13 kDa-A subunit                                   | 13.02  | 869.96   | 633.3    | 1094.25  | 0.80 | 0.58 |
| P62814.1 | Vacuolar proton pump subunit B 2                                                  | 56.56  | 2339.58  | 2572.93  | 2953.1   | 0.79 | 0.87 |
| Q9EP71.1 | Retinoic acid-induced protein 14                                                  | 108.08 | 3653.89  | 5338.87  | 4686.06  | 0.78 | 1.14 |
| P27546.3 | Microtubule-associated protein 4                                                  | 117.45 | 855.09   | 383.34   | 1117.41  | 0.77 | 0.34 |
| P17809.3 | Glucose transporter type 1, erythrocyte/brain                                     | 53.94  | 3684.66  | 9443.52  | 4837.93  | 0.76 | 1.95 |
| P15499.1 | Retinal degeneration slow protein                                                 | 39.26  | 8905.9   | 15421.94 | 11879.78 | 0.75 | 1.30 |
| Q99KI0.1 | Aconitase hydratase, mitochondrial                                                | 85.48  | 1993.78  | 1867.84  | 2681.46  | 0.74 | 0.70 |
| Q92111.1 | Serotransferrin                                                                   | 76.73  | 2642.53  | 4720.96  | 3560.57  | 0.74 | 1.33 |
| Q9D3A9.1 | Protein tweety homolog 1                                                          | 49.04  | 2511.88  | 2466.45  | 3388.76  | 0.74 | 0.73 |
| O88342.3 | Actin-interacting protein 1                                                       | 66.41  | 4787.73  | 7575.24  | 6643.07  | 0.72 | 1.14 |
| P27546.3 | Microtubule-associated protein 4                                                  | 117.45 | 275.52   | 598.97   | 402.33   | 0.68 | 1.49 |
| Q9CPQ8.1 | ATP synthase subunit g, mitochondrial                                             | 11.43  | 2082.21  | 4385.03  | 3053.01  | 0.68 | 1.44 |
| O08976.2 | Probasin                                                                          | 20.38  | 26372.59 | 32807.65 | 39200.98 | 0.67 | 0.84 |
| P06801.1 | NADP-dependent malic enzyme                                                       | 64.01  | 1084.34  | 2229.28  | 1612.96  | 0.67 | 1.38 |
| O08599.2 | Syntaxin-binding protein 1                                                        | 67.58  | 226.26   | 757.66   | 378.09   | 0.60 | 2.00 |
| P04247.3 | Myoglobin                                                                         | 17.07  | 2098.5   | 781.91   | 3514.57  | 0.60 | 0.22 |
| Q8C0M9.1 | L-asparaginase                                                                    | 33.95  | 871.68   | 2270     | 1476.76  | 0.59 | 1.54 |
| Q8K0T0.1 | Reticulon-1                                                                       | 83.59  | 380.69   | 677.67   | 680.44   | 0.56 | 1.00 |
| O08585.1 | Clathrin light chain A                                                            | 25.56  | 2569.7   | 4565.74  | 4737.19  | 0.54 | 0.96 |
| P57746.1 | Vacuolar proton pump subunit D                                                    | 28.37  | 442.02   | 1459.57  | 823.26   | 0.54 | 1.77 |
| P50247.3 | Adenosylhomocysteinase                                                            | 47.69  | 2025.84  | 4219.91  | 3889.91  | 0.52 | 1.08 |
| O08976.2 | Probasin                                                                          | 20.38  | 7554.27  | 6566.12  | 14589.21 | 0.52 | 0.45 |
| P02815.1 | Salivary protein 1                                                                | 14.9   | 12680.64 | 5718.15  | 24586.55 | 0.52 | 0.23 |
| Q6PDM2.3 | Splicing factor, arginine/serine-rich 1                                           | 27.75  | 541.26   | 942.15   | 1061.18  | 0.51 | 0.89 |
| Q9D2G2.1 | 2-oxoglutarate dehydrogenase complex component E2                                 | 49     | 394.27   | 0        | 813.02   | 0.48 | 0.00 |
| Q8QZT1.1 | Acetoacetyl-CoA thiolase                                                          | 44.82  | 1703.96  | 4261.44  | 3817.38  | 0.45 | 1.12 |
| P62192.1 | 26S protease regulatory subunit 4                                                 | 49.19  | 277      | 1652.09  | 651.05   | 0.43 | 2.54 |
| Q9WV34.1 | MAGUK p55 subfamily member 2                                                      | 61.57  | 202.95   | 531.72   | 525.45   | 0.39 | 1.01 |
| O08749.2 | Dihydrolipoamide dehydrogenase                                                    | 54.28  | 700.22   | 0        | 1860.22  | 0.38 | 0.00 |
| O70318.1 | Band 4.1-like protein 2                                                           | 109.85 | 178.93   | 324.47   | 484.9    | 0.37 | 0.67 |
| Q9D517.2 | Lysophosphatidic acid acyltransferase gamma                                       | 43.3   | 287.28   | 1338.05  | 869.17   | 0.33 | 1.54 |
| P10649.2 | Glutathione S-transferase Mu 1                                                    | 25.97  | 1729.98  | 2842.55  | 5662.55  | 0.31 | 0.50 |
| P07310.1 | Creatine kinase M-type                                                            | 43.05  | 11340.89 | 10513.62 | 37826.51 | 0.30 | 0.28 |

|                      |                                                         |        |         |         |          |       |       |
|----------------------|---------------------------------------------------------|--------|---------|---------|----------|-------|-------|
| P47754.3             | F-actin-capping protein subunit alpha-2                 | 32.97  | 499.91  | 1174.93 | 2244.32  | 0.22  | 0.52  |
| O70250.3             | Phosphoglycerate mutase 2                               | 28.83  | 2478.61 | 5030.17 | 12911.49 | 0.19  | 0.39  |
| Q8R429.1             | Sarcoplasmic/endoplasmic reticulum calcium ATPase 1     | 109.44 | 1248.09 | 2362.68 | 6851.04  | 0.18  | 0.34  |
| P32848.3             | Parvalbumin alpha                                       | 11.93  | 2042.29 | 3104.07 | 11694.83 | 0.17  | 0.27  |
| P21550.3             | Skeletal muscle enolase                                 | 47.03  | 498.13  | 1332.36 | 4512.41  | 0.11  | 0.30  |
| Q9Z1G4.2             | Vacuolar proton pump subunit 1                          | 96.52  | 0       | 667.56  | 723.82   | 0.00  | 0.92  |
| Q91XV3.3             | Neuronal axonal membrane protein NAP-22                 | 22.09  | 0       | 0       | 338.21   | 0.00  | 0.00  |
| Q9D6Y9.1             | Glycogen-branching enzyme                               | 80.37  | 0       | 299.48  | 409.97   | 0.00  | 0.73  |
| O54984.2             | Arsenite-stimulated ATPase                              | 38.83  | 0       | 1533.96 | 939.77   | 0.00  | 1.63  |
| P16858.2             | Glyceraldehyde-3-phosphate dehydrogenase                | 35.81  | 0       | 0       | 370.38   | 0.00  | 0.00  |
| P84091.1             | Mu2-adaptin                                             | 49.66  | 0       | 0       | 315.11   | 0.00  | 0.00  |
| P70296.3<br>Q8VIN1.1 | Phosphatidylethanolamine binding protein 1              | 20.83  | 0       | 0       | 0        | Undef | Undef |
| Q61937.1             | Nucleophosmin 1                                         | 32.57  | 0       | 0       | 0        | Undef | Undef |
| Q9ERD7.1             | Tubulin beta-3 chain                                    | 50.43  | 0       | 0       | 0        | Undef | Undef |
| Q9WV92.1             | Band 4.1-like protein                                   | 103.36 | 0       | 0       | 0        | Undef | Undef |
| Q64213.5             | Splicing factor 1                                       | 70.42  | 0       | 731.52  | 0        | Undef | Undef |
| Q8BK64.2             | Activator of 90 kDa heat shock protein ATPase homolog 1 | 38.12  | 0       | 0       | 0        | Undef | Undef |
| Q8CIN4.1<br>O88643.1 | Serine/threonine-protein kinase PAK 2                   | 57.94  | 0       | 0       | 0        | Undef | Undef |
| O70443.4             | Guanine nucleotide binding protein, alpha z subunit     | 40.86  | 0       | 3016.61 | 0        | Undef | Undef |
| Q9Z1L4.1             | Retinoschisin                                           | 25.58  | 0       | 2769.02 | 0        | Undef | Undef |
| O08547.3             | Vesicle-trafficking protein SEC22b                      | 24.75  | 0       | 0       | 0        | Undef | Undef |
| Q921U8.2             | Smoothelin                                              | 100.31 | 0       | 396.43  | 0        | Undef | Undef |

Ratios were determined by dividing total area of the designated experimental group by total area of the control group

\*Undef: undefined

**Table S2.** PCR primers. Commercially designed (Applied Biosystems)

| <b>Gene Symbol</b> | <b>Assay ID number</b> |
|--------------------|------------------------|
| <i>Ccl2</i>        | Mm00441242_m1          |
| <i>Nos2</i>        | Mm00440502_m1          |
| <i>Il1b</i>        | Mm00434228_m1          |
| <i>Tnfa</i>        | Mm00443258_m1          |
| <i>Cxcl10</i>      | Mm00445235_m1          |
| <i>Arg1</i>        | Mm00475988_m1          |
| <i>Cd163</i>       | Mm00474091_m1          |
| <i>Mrc1</i>        | Mm00485148_m1          |
| <i>Gapdh</i>       | Mm99999915_g1          |
